# Supplementary material for: Aggresomal sequestration and STUB1-mediated ubiquitylation during mammalian proteaphagy of inhibited proteasomes
Source: PubMed Central journal article supplement — Proc Natl Acad Sci U S A. 2020 Jul 28;117(32):19190–200. doi: 10.1073/pnas.1920327117 (PMC7430983; doi:10.1073/pnas.1920327117), 2020-07-28
Supplement: pnas.1920327117.sapp.pdf [file pnas.1920327117.sapp.pdf]

Supplementary Information for

**Aggresomal Sequestration and STUB1-Mediated Ubiquitylation during Mammalian Proteophagy of Inhibited Proteasomes**

Won Hoon Choi, Yejin Yun, Seoyoung Park, Jun Hyoung Jeon, Jeeyoung Lee, Jung Hoon Lee, Su-A Yang, Nak-Kyoon Kim, Chan Hoon Jung, Yong Tae Kwon, Dohyun Han, Sang Min Lim, and Min Jae Lee\*

\*Min Jae Lee  
Email: [minjlee@snu.ac.kr](mailto:minjlee@snu.ac.kr)

**This PDF file includes:**

Supplementary Figures 1 to 9  
Supplementary Methods  
Supplementary References  
Supplementary Table 1

## SUPPLEMENTARY FIGURES

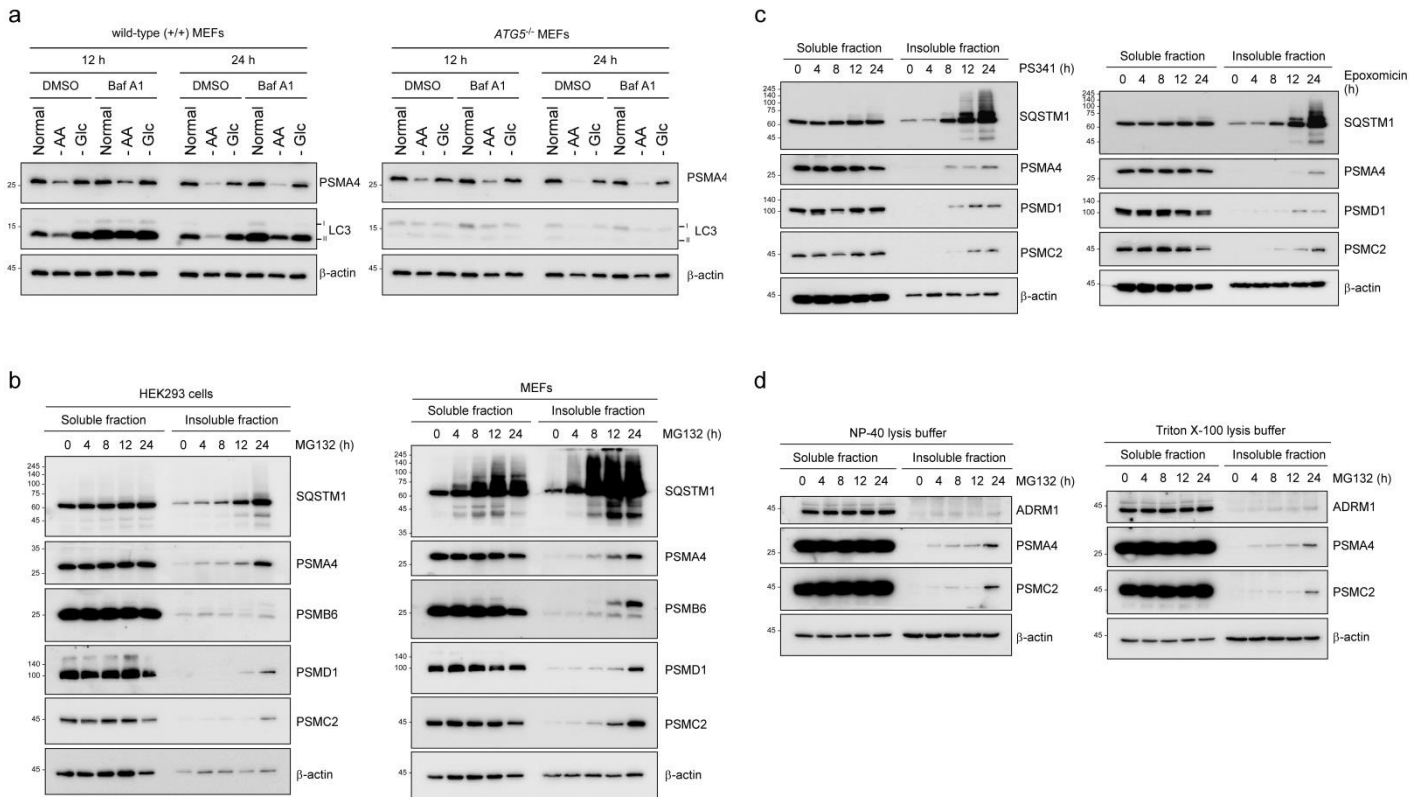

**Supplementary Figure 1. Changes of proteasome amounts in the soluble and insoluble fractions. (a)** Induction of autophagy had little effect on the proteasome levels in the soluble fraction. Wild-type (+/+) or *ATG5*-null (*ATG5*<sup>-/-</sup>) mouse embryonic fibroblasts (MEFs) were treated with a nutrient-deprived medium (amino acid-free [- AA] or glucose-free [- Glc]) in the presence or absence of bafilomycin A1 (BafA1; 100 nM) for 12 h or 24 h. Whole-cell extracts (WCEs) were prepared from the Triton-X-100-based lysis buffer, and the samples from the soluble fraction were subjected to SDS-PAGE and immunoblotting (IB) for PSMA4/ $\alpha$ 3, LC3, and  $\beta$ -actin. Of note, the reduced levels of proteasome subunit PSMA4 under the nutrient deprivation conditions was not recovered when autophagy was either genetically or chemically inhibited, indicating that bulk autophagy hardly results in the degradation of proteasome subunits. **(b)** Significantly accumulated proteasome subunits in the Triton-X-100-insoluble fractions were detected in different cell types such as HEK293 cells and mouse embryonic fibroblasts (MEFs) as in A549 cells. **(c)** Both reversible and irreversible proteasome inhibitors, such as PS341 and epoxomicin, respectively, induced the accumulation of proteasomes in the insoluble fraction of WCEs from A549 cells. **(d)** Lysis buffers containing different detergents, such as NP-40 (1%) or Triton X-100 (1%) showed comparable consequences for the proteasome segregation in A549 cells. These data complement Figs. 1a and 1b.

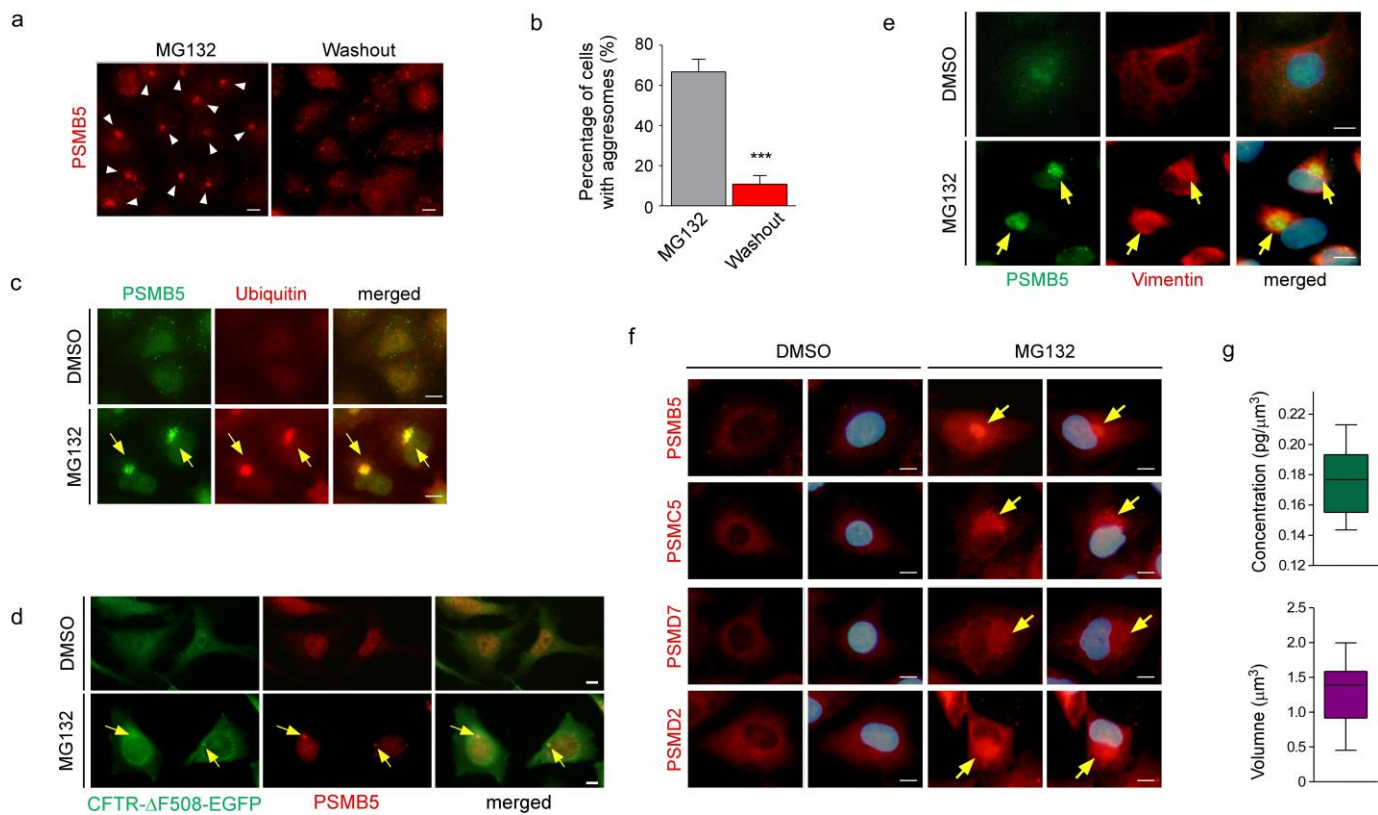

**Supplementary Figure 2. Inhibited proteasomes were localized in the juxtannuclear aggresome after prolonged MG132 treatment.** (a) Low-magnification images of the juxtannuclear inclusion body formed in A549 cells after 12 h treatment with MG132 (10  $\mu$ M) with or without media washout (12 h). Immunofluorescence staining (IFS) for PSMB5 (red). Most cells showed proteasome-positive signals usually as one large punctum near the nucleus. (b) Quantitation of (a). Percentage of cells with aggresomes after MG132 treatment (10  $\mu$ M for 12 h) or MG132 treatment followed with media washout (12 h) were counted and plotted as mean  $\pm$  SD of three independent experiments with >1,000 cells. \*\*\*,  $p < 0.001$  (two-tailed Student's  $t$  test). (c) Proteasome-positive puncta (PSMB5, green) were found to be colocalized with Ub (red) in MG132-treated A549 cells. (d) Cystic fibrosis transmembrane conductance regulator (CFTR)- $\Delta$ F508 (green), which is a misfolded protein generated during the translational process, was found to colocalize with the proteasome-positive cytoplasmic puncta (PSMB5, red). (e) IFS using anti-vimentin antibody. A549 cells were treated with 5  $\mu$ M MG132 for 12 h. (f) The RP subunits such as PSMC5, PSMD2, PSMD5 were localized in an enlarged juxtannuclear inclusion body similar to that of the CP subunit PSMB5 after the prolonged MG132 treatment. Scale bars = 10  $\mu$ m. These data complement Fig. 1c. (g) Quantitative analysis of tomographic images, measuring the mean volume and concentration of the aggresomes (*see* Methods for details). A box-and-whisker plot with N = 29. These data complement Figs. 1d and 1e.

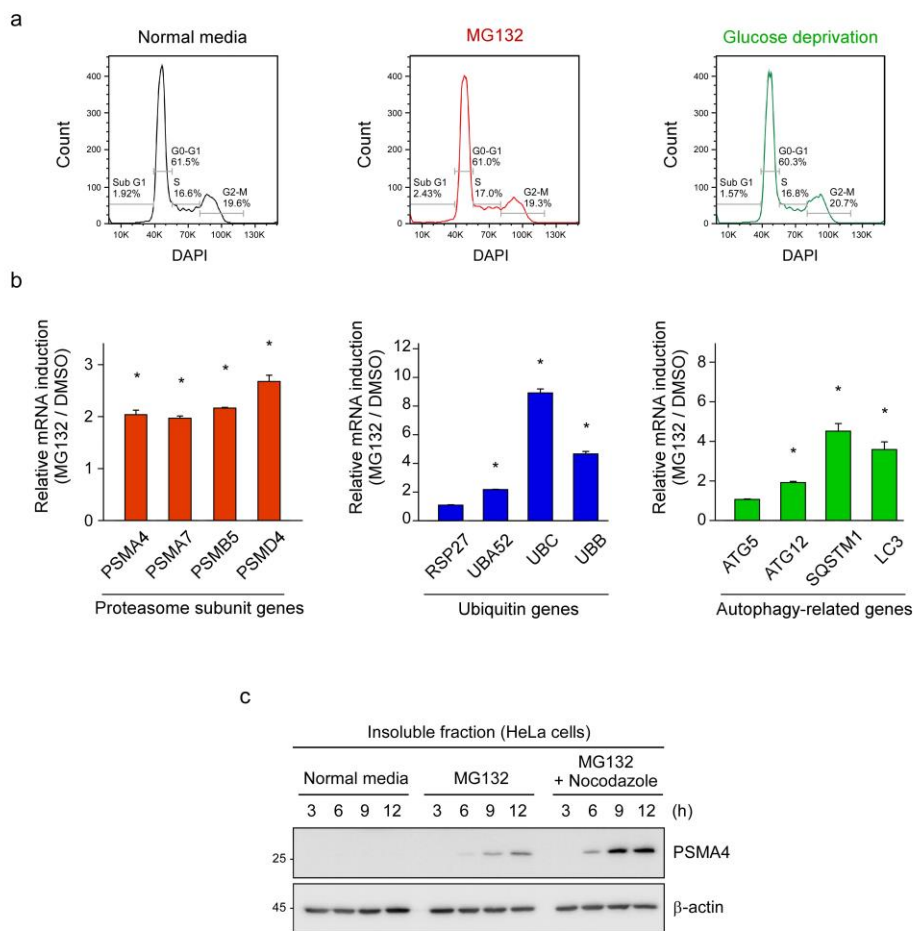

**Supplementary Figure 3. Consequences of prolonged treatment with the proteasome inhibitor.** (a) Fluorescence-activated cell sorting (FACS) analysis was performed to quantify DNA contents and showed little effect of the proteasome inhibitor MG132 (5  $\mu$ M, 6 h) or glucose deprivation (6 h) on the cell cycle. HeLa cells treated with either MG132 or a glucose-free medium were stained with 4',6'-diamidino-2-phenylindole (DAPI) and then analyzed by FACS. (b) Total RNA was isolated from HeLa cells after the treatment with MG132 (5  $\mu$ M) for 12 h, and quantitative RT-PCR analyses were performed on proteasome subunit genes, ubiquitin B (*UBB*), ubiquitin C (*UBC*), and autophagy-related genes. The *GAPDH* mRNA levels were used to normalize the other mRNA levels. Statistical significance was analyzed via the means  $\pm$  SD from three independent experiments (n = 3). \*,  $p < 0.01$  (one-way analysis of variance (ANOVA) with Bonferroni's multiple comparison test). (c) Deposition of proteasomes in the insoluble fractions of HeLa cells when treated with MG132 (5  $\mu$ M) or with MG132 plus nocodazole (1  $\mu$ M) 12 h. These data supplement Fig. 1g.

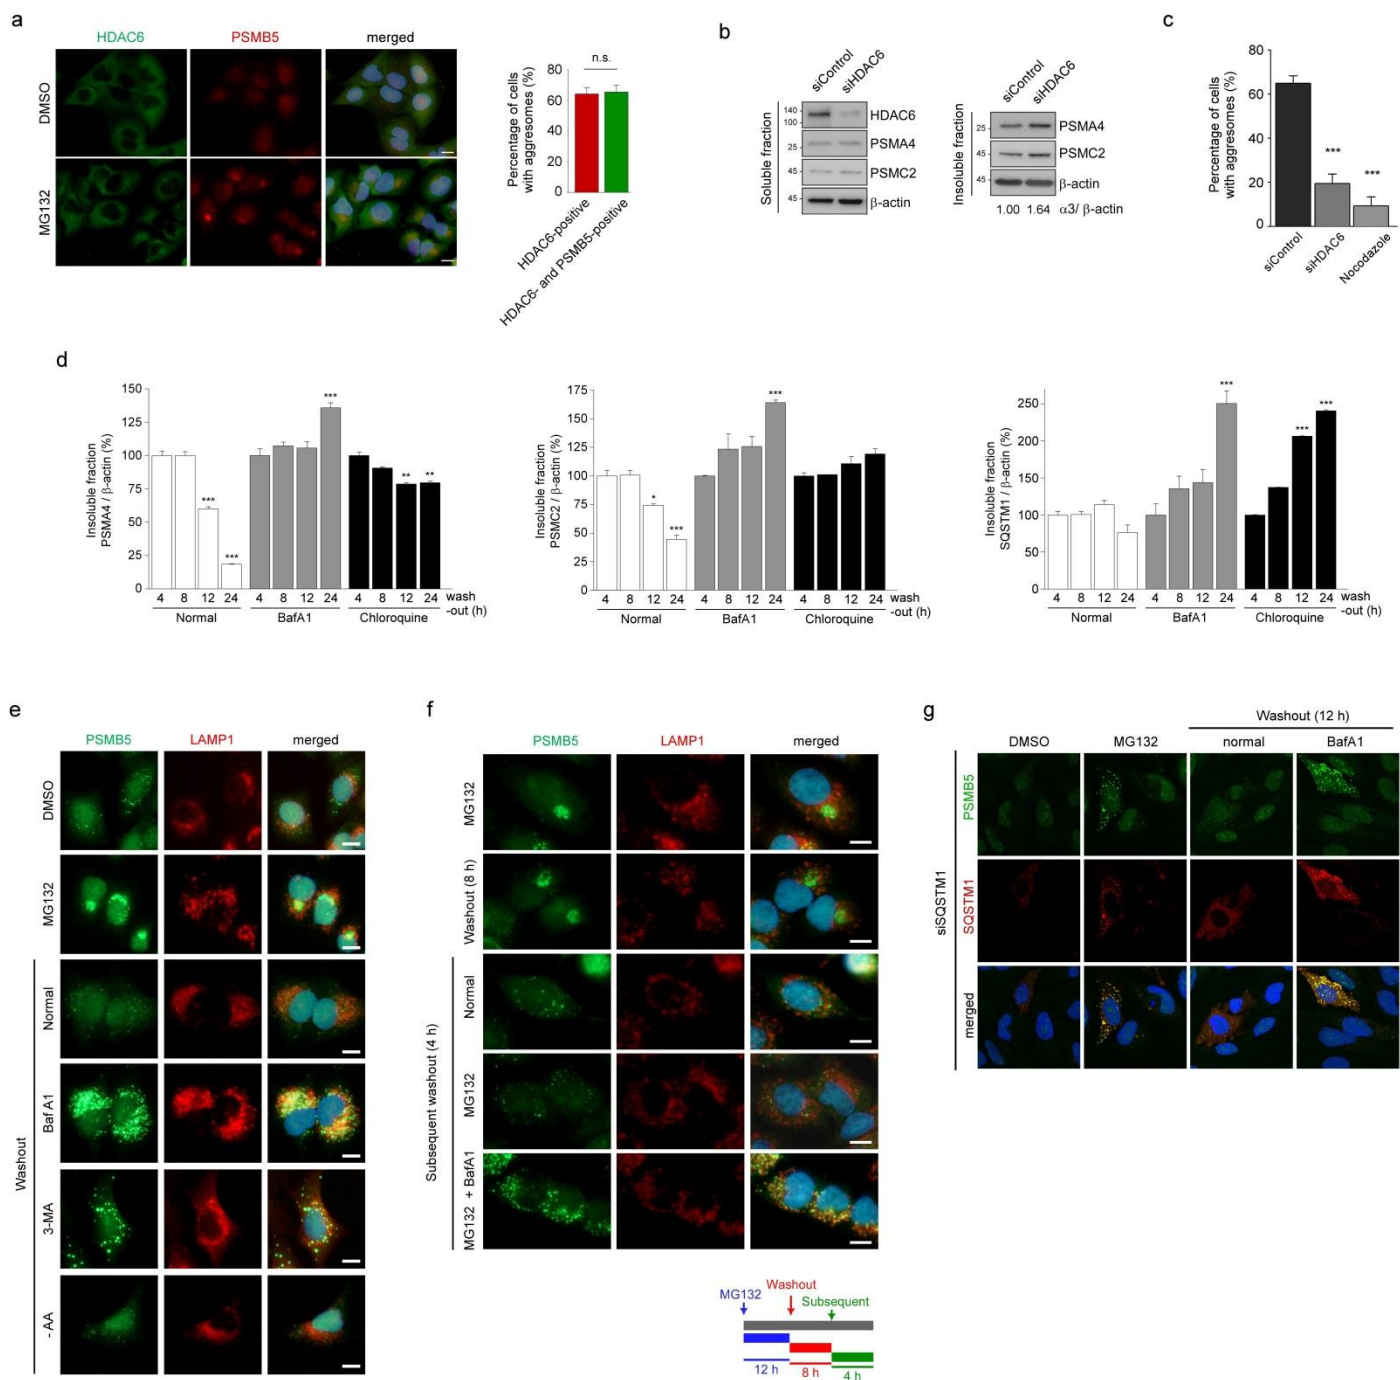

**Supplementary Figure 4. Essential roles of HDAC6 and autophagy in the segregation and degradation of inhibited proteasomes, respectively.** (a) (*left*) Endogenous HDAC6 in A549 cells was immunostained after treatment with DMSO or 5  $\mu$ M MG132 for 12 h, which was found to strongly colocalize with the proteasome-positive inclusion body. IFS with anti-HDAC6 (green) and anti-PSMB5 (red) antibodies. Scale bars = 10  $\mu$ m. (*right*) Quantitation of the percentage of cells containing HDAC6-

and PSMB5-positive aggresomes. n.s., no significance. **(b)** A549 cells were transfected with either 10 nM scrambled siRNA (siControl) or siRNA for silencing *HDAC6* (siHDAC6). Protein samples were collected 48 h post-transfection, separated into Triton-X-100-soluble and -insoluble fractions, and analyzed by SDS-PAGE/IB. **(c)** Quantitation of IFS results from Figs. 1f and 1i. A549 cells were incubated with either nocodazole (2  $\mu$ M) plus MG132 (5  $\mu$ M) for 12 h or siHDAC6 (20 nM for 48 h pretreatment) followed by MG132 treatment (5  $\mu$ M for additional 12 h). Each bar represents the mean ( $\pm$  SD) of three independent experiments with > 1,000 cells. \*\*\*,  $p < 0.001$  (one-way ANOVA followed by the Bonferroni *post hoc* test). These data supplement Figs. 1f and 1i. **(d)** Quantitation of PSMA4 (*left*), PSMC2 (*middle*), and SQSTM1 (*right*) signals in Fig. 2a, normalized to those of endogenous  $\beta$ -actin. \*,  $p < 0.05$ , \*\*,  $p < 0.01$ , \*\*\*,  $p < 0.001$ , compared with 4 h washout points in each condition (one-way ANOVA followed by the Bonferroni *post hoc* test) **(e)** Colocalization of LAMP1 with PSMB5 was detected by IFS after treatment with MG132 (5  $\mu$ M, 12 h) and a washout in a normal medium, BafA1- or 3-methyladenine (3-MA)-containing medium, or amino acid-deficient (-AA) medium for 12 h. These data supplement Figs. 2b and 2c. Scale bars: 10  $\mu$ m. **(f)** As in (e), except that initial washout with normal media was performed for 8 h and then secondary washout was proceeded with media containing MG132 (5  $\mu$ M) or MG132 plus BafA1 (100 nM) for subsequent 4 h. **(g)** HeLa cells were transfected with siSQSTM1 for 24 h, treated with 5  $\mu$ M MG132 for 12 h, and then subjected to the washout with the normal medium or a BafA1 containing medium. IFS analysis was performed with anti-PSMB5 (green) and anti-SQSTM1 (red) antibodies.

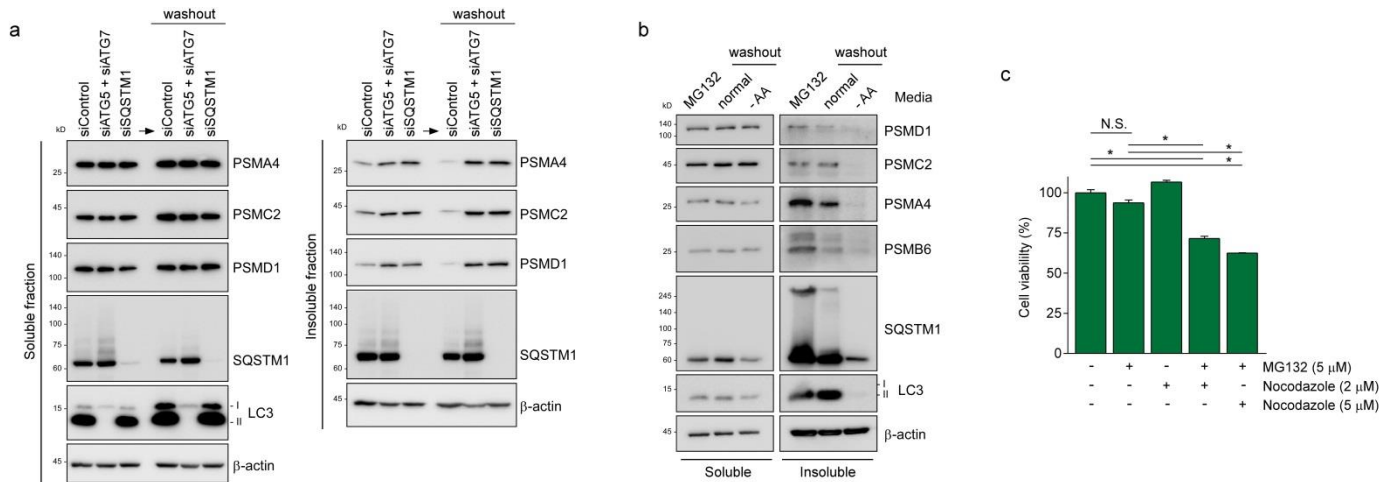

**Supplementary Figure 5. Involvement of autophagy in the proteasome clearance and protective effect of aggresome formation in the cell.** (a) The knockdown of autophagy genes resulted in delayed clearance of proteasome subunits in the insoluble fractions after the washout. A549 cells were transfected with siControl, siSQSTM1, and a combination of siATG5 and siATG7 for 48 h. Then, the cells were treated with MG132 (5  $\mu$ M, 12 h), followed by medium washout for 18 h. Detergent-insoluble fractions were analyzed by IB using CP and RP antibodies. (b) During the MG132 washout, an amino acid-deprived (-AA) medium, which induces overall cellular autophagy, was applied. Levels of various proteins such as PSMD1, PSMC2, PSMA4, PSMB6, SQSTM1, LC3, and  $\beta$ -actin in the detergent-soluble and -insoluble fractions were analyzed by SDS-PAGE/IB. (c) Cell viability was measured after 5  $\mu$ M MG132 treatment in the presence or absence of nocodazole (2 or 5  $\mu$ M). Values are presented as mean  $\pm$  SD (n = 3); \*,  $p < 0.01$  (one-way ANOVA with Bonferroni's multiple comparison test). N.S., no significance.



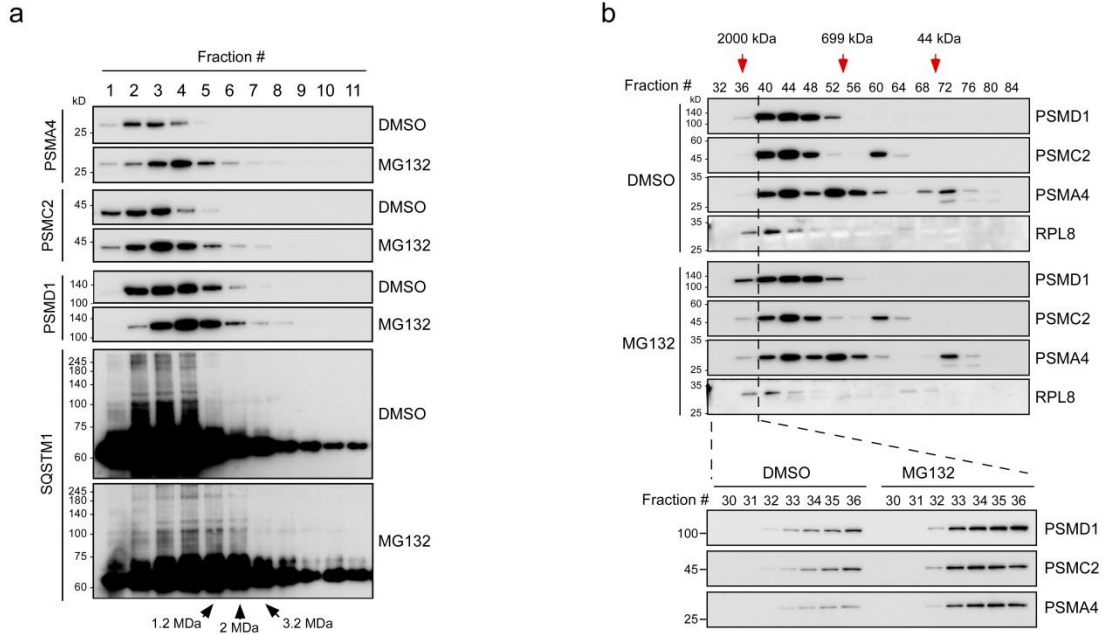

**Supplementary Figure 6. Analysis of proteasomes in WCEs after MG132 treatment.** (a) Sucrose-gradient ultracentrifugation of WCEs from HeLa cells with treatment with DMSO or MG132 (5  $\mu$ M, 12 h). Fractionized samples were analyzed by SDS-PAGE/IB with antibodies against various proteasome subunits such as PSMD1, PSMC2, and PSMA4, with SQSTM1 as controls. A significant proportion of the CP and RP subunits appeared to be shifted from the free form to the 26S species based on the sizes. (b) Size-exclusion chromatography of WCEs from A549 cells with treatment with DMSO or MG132 (5  $\mu$ M, 12 h). Immunoblotting analysis revealed proteasome subunits in the earlier fractions from the MG132-treated samples. Cofractionated molecular-weight standards such as blue dextran (2 MDa), thyroglobulin (669 kDa), and apoferritin (44.3 kDa) were indicated on top of the immunoblots.



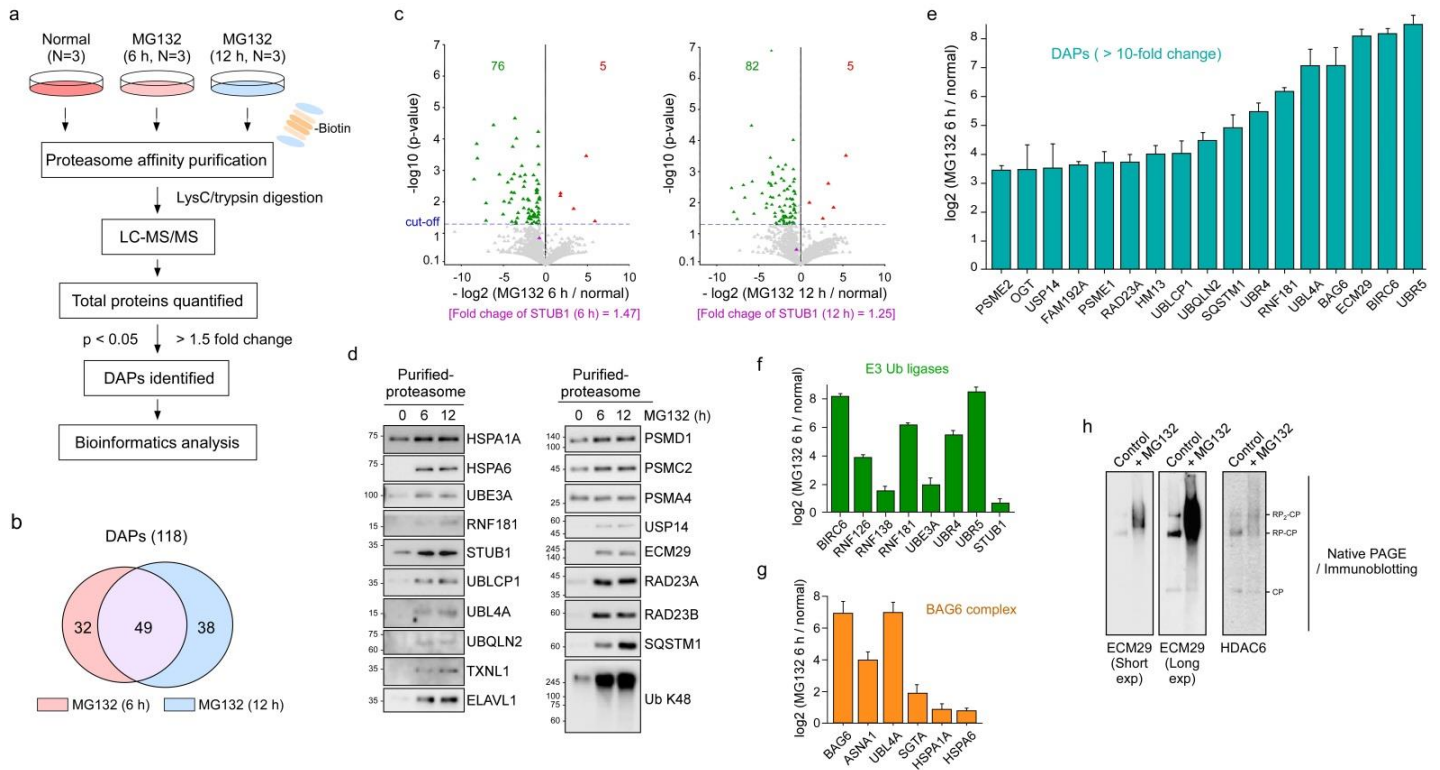

**Supplementary Figure 7. Identification and validation of proteasome-interacting proteins with mass spectrometry (MS) based on intensity-based absolute quantification (iBAQ).** (a) An overview of the LC-MS/MS approach, which was used for the quantitation of the inhibited-proteasome-interacting proteins by label-free methods. A total of 118 differentially associated proteins (DAPs) were identified in the cells treated with MG132 for 6 and 12 h, as compared to the cells under normal conditions. (b) A Venn diagram summary of the DAPs copurified with the inhibited proteasome. (c) The Volcano plot of DAPs. A threshold of the  $p$  value ( $p < 0.05$ ) is shown as a blue dotted line. Log<sub>2</sub> ratios of purified proteasomes after treatment with MG132 to purified proteasomes under normal conditions are shown with gray (<1.5-fold change), green (>1.5-fold increase in purified proteasomes after proteasome inhibition), and red (>1.5-fold decrease in purified proteasomes after proteasome inhibition). (d) Immunoblotting analysis of the DAPs identified by iBAQ-MS. (e) The list of DAPs with more than 10-fold changes after 6 h of MG132 treatment, which includes E3 Ub ligases, proteasome modifiers, and Ub-like proteins. (f, g) Representative quantitation data comparing E3 Ub ligases (f) and the components of the BAG6 complex (g) after MG132 treatment. (h) Strong association of ECM29 and HDAC6 with the 26S proteasome was analyzed by non-denaturing (native) PAGE/IB of purified proteasomes.

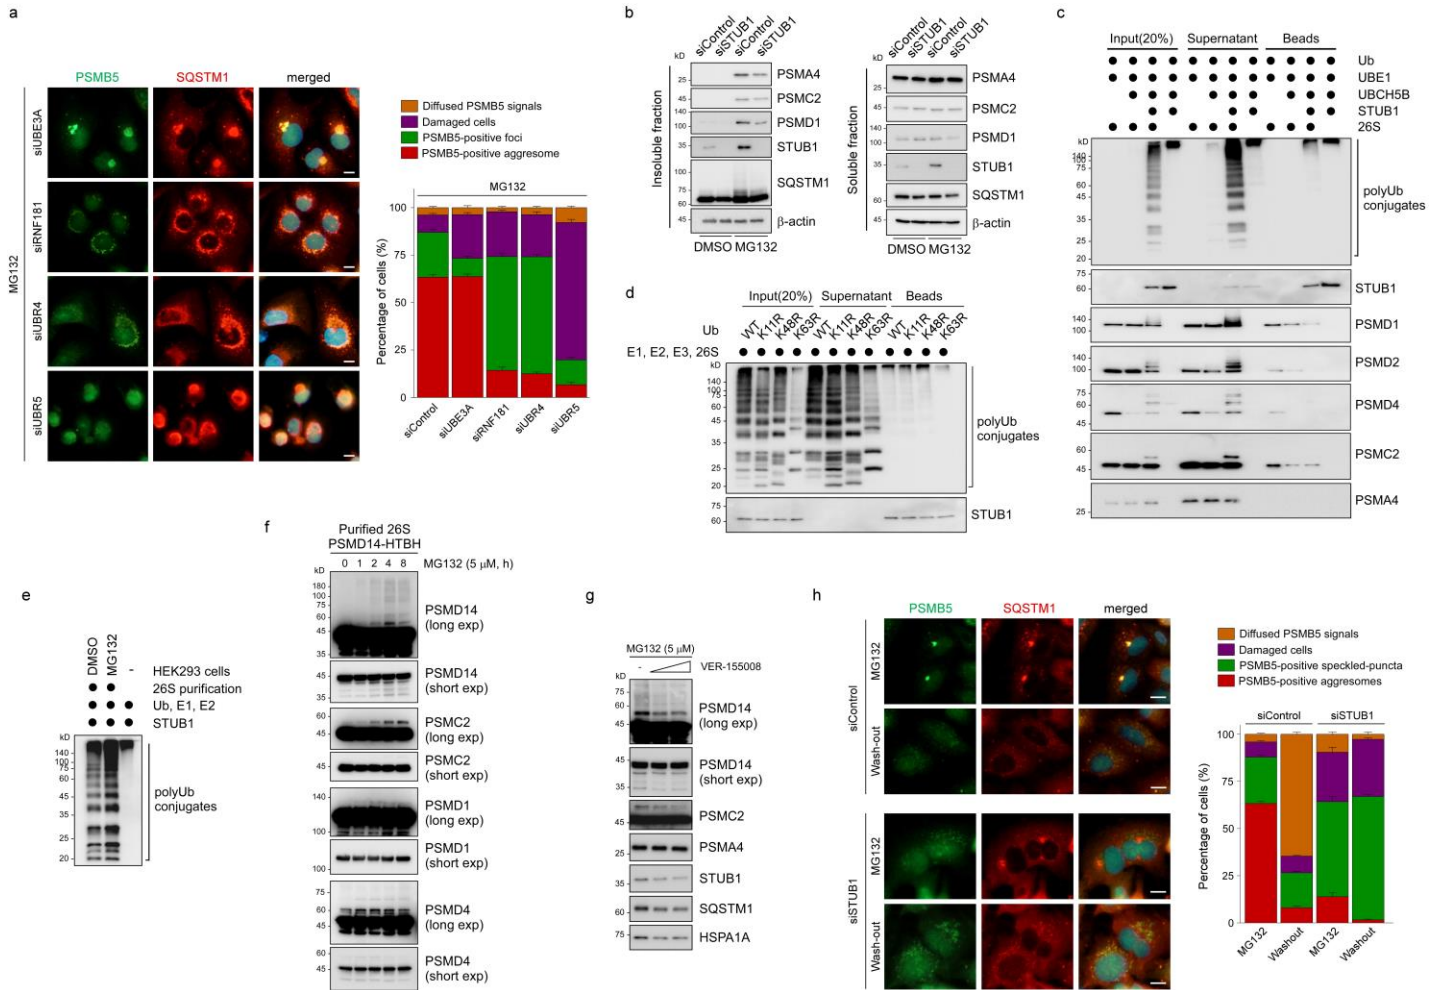

**Supplementary Figure 8. Critical role of STUB1 in the aggresomal segregation step of inhibited proteasomes.** (a) Effects on aggresome formation when A549 cells were transfected siRNA constructs as indicated. The cells were analyzed by IFS with anti-PSMB5 (green) and anti-SQSTM1 (red) antibodies after MG132 treatment (5  $\mu$ M, 12 h). The columns and error bars in the quantitation based on the punctate morphology represent the mean and S.E.M. of three biological replicates. More than two hundred of the transfected cells were evaluated for proteasome positive aggregation patterns in each experiment. These data supplement Fig. 3a. (b) A549 cells were transfected with either 20 nM scrambled siRNA (siControl) or siRNA for silencing *STUB1* (siSTUB1) for 36 h and treated with MG132 (10  $\mu$ M for 12 h). Protein samples were collected, separated into Triton-X-100-soluble and -insoluble fractions, and analyzed by SDS-PAGE/IB. (c) *In vitro* polyubiquitylation of affinity-purified human proteasomes. The 26S proteasomes were and incubated with recombinant Ub, UBE1, UBE2D2, and GST-tagged STUB1 proteins in different combinations. GST-STUB1 was subsequently removed

using glutathione-agarose. The ubiquitylation of 26S proteasomes (Supernatants) and STUB1 (Beads) was monitored with SDS-PAGE/IB using anti-Ub antibodies. These data supplement Fig. 3c. **(d)** As in Fig. 3g, glutathione beads-bound GST-STUB1 was separated from the reaction products in the supernatants and subject to SDS-PAGE/IB using anti-Ub antibodies. **(e)** *In vitro* polyubiquitylation reactions were conducted with purified 26S proteasomes from the cells treated with DMSO or MG132 (5  $\mu$ M, 12 h) and used for the *in vitro* reaction with Ub, UBE1, UBE2D2, and STUB1. These data complement Fig. 3h. **(f)** *In vivo* ubiquitylation of proteasomes in HEK293 cells stably overexpressing biotin-tagged RP subunit PSMD14, which were treated with MG132 (5  $\mu$ M) for indicated time periods. Human proteasomes were affinity-purified from WCEs and then analyzed by SDS-PAGE/IB. **(g)** As in (f), except that cells were pre-treated with 0, 25, or 50  $\mu$ M of HSP70 inhibitor VER-155008 for 2 h, and then treated with MG132 (5  $\mu$ M) for additional 6h. SDS-PAGE/IB analysis revealed that *in vivo* ubiquitylation of PSMC2 and PSMD14 was delayed in the presence of VER-155008. **(h)** Delayed elimination of cytoplasmic puncta formed in *STUB1* knockdown cells after MG132 treatment (5  $\mu$ M, 12 h) and after subsequent washout (12 h). The cells were next analyzed by IFS with anti-PSMB5 (green) and anti-SQSTM1 (red) antibodies. The columns and error bars in the quantitation based on the punctate morphology represent the mean and S.E.M. of three biological replicates. More than two hundred of the transfected cells were evaluated for proteasome positive aggregation patterns in each experiment.

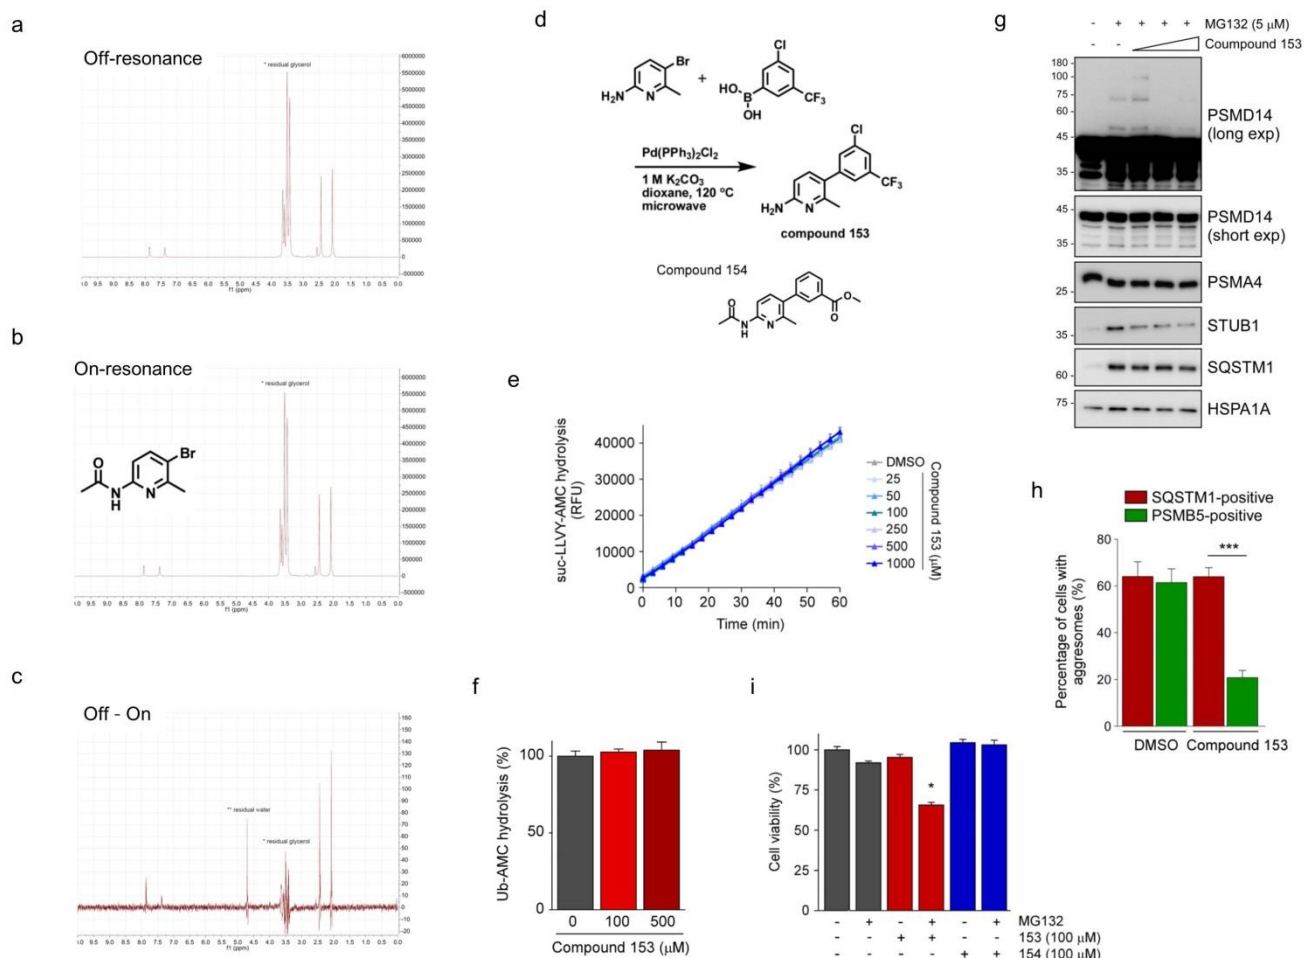

**Supplementary Figure 9. Screening of STUB1-interacting fragments, and synthesis and biochemical analysis of compound 153.** (a and b) Representative  $^1\text{H}$ -NMR spectroscopic data for the screening of STUB1-interacting fragments. Our screening utilized a ligand-observed NMR assay monitoring differences in the ligand spectra upon interaction with STUB1 proteins. For saturation transfer difference (STD), NMR signals of STUB1 was selectively saturated by radio frequency (RF) irradiation (“Off” status, a) and this saturation was specifically transferred to the hit ligand (“On”, b). (c) The difference in proton spectra between “Off” and “On” status. Four lead fragments were identified from the primary and secondary screening. The chemical structure of the hit compound is shown. Peaks from residual glycerol (\*) and residual water (\*\*) in the screening buffer are indicated in the proton NMR spectra. (d) The fragment hits were utilized as *bona fide* starting points for further synthesis of lead compounds to target multiple segments of STUB1 proteins. The brief scheme for compound 153 synthesis is shown. Chemical structure of a structural control compound 154 is also shown. These data

complement Fig. 4a. **(e)** Assays of suc-LLVY-AMC hydrolysis were performed with purified human proteasomes with various concentrations of compound 153, which shows virtually no effect up to 1 mM. **(f)** Deubiquitinating activity of purified proteasomes was monitored by Ub-AMC hydrolysis assay with compound 153. **(g)** *In vivo* ubiquitylation of PSMD14 subunit was delayed with compound 153. Cells were pre-treated with 12.5, 25, or 50  $\mu$ M compound 153 for 2 h, and then treated with MG132 (5  $\mu$ M) for 6h. Human proteasomes were affinity-purified from WCEs and then analyzed by SDS-PAGE/IB. Notably, the amounts of proteasome-associating STUB1 decreased in the presence of compound 153. **(h)** Quantitation of A549 cells with PSMB5-positive (green) or SQSTM1-positive (red) aggresomes. Cells were treated with MG132 (5  $\mu$ M, 12 h) in the absence or presence of compound 153 (75  $\mu$ M, 12 h). Each bar represents the mean ( $\pm$  SD) of three independent experiments with > 1,000 cells. \*\*\*,  $p < 0.001$  (two-tailed Student's  $t$  test). These data supplement Fig. 4e. **(i)** Assessment of cytotoxicity from the small molecules. Compound 153 and 154 were cotreated to A549 cells at 100  $\mu$ M concentration with 5  $\mu$ M MG132. After 12 h of the incubation, CellTiter-Glo bioluminometric cell viability assay was performed. Each data point is a mean  $\pm$  SD of three independent experiments.

## SUPPLEMENTARY METHODS

### Plasmids, antibodies, and reagents

Plasmids expressing HDAC6 and dynein were purchased from Addgene. Various plasmids encoding STUB1 were kindly provided by J. Song<sup>1</sup>. The plasmid DNA was amplified with the Plasmid Midi Kit (GeneAll), according to the manufacturer's directions, and was stored at  $-20^{\circ}\text{C}$  until use. Antibody sources and dilution factors were as follows: anti- $\beta$ -actin (A1978, Sigma, 1/10,000), anti-Ub (clone P4D1, Santa Cruz Biotechnology, 1/5,000), anti-GAPDH (sc-32233, Santa Cruz Biotechnology, 1/1,000), anti-PSMA4 (PW8115, Enzo Life Science, 1/5,000), anti-PSMA3 (PW8110, Enzo Life Sciences, 1/3,000), anti-PSMB5 (PA1977, Invitrogen, 1/1,000), anti-PSMC2 (sc-166972, Santa Cruz Biotechnology, 1/1,000), anti-PSMD1 (sc-514809, Santa Cruz Biotechnology, 1/1,000), anti-PSMD14 (ab109123, Abcam, 1/1,000), anti-ADRM1 (ABS296-0100, Enzo Life Science, 1/1,000), anti-HDAC6 (MA5-25317, Invitrogen, 1/1,000), anti-ECM29 (PA3-035, Invitrogen, 1/250), anti-FLAG (F1804, Sigma, 1/3,000), anti-GST (MA4-004, Invitrogen, 1/1,000), anti-SQSTM1 (ab56416, Abcam, 1/10,000), anti-LC3 (L7543, Sigma, 1/2,000), anti-STUB1 (A301-572A, Bethyl Laboratories, 1/1,000), and anti-GFP antibody (Enogene, 1/5,000). Sources of major biochemical reagents were as follows: MG132, succ-LLVY-AMC (Bachem); PS341 (LC Laboratories); epoxomicin, Ub-AMC (Boston Biochem); carfilzomib (Cayman); ATP (Calbiochem); Coomassie Brilliant Blue R250 (Sigma). DMEM, RPMI, and EBSS media, fetal bovine serum (FBS), and phosphate-buffered saline (PBS; pH 7.4) were purchased from WelGENE.

### Mammalian cell cultures and transient expression

Mammalian cells used in this study, including HEK293, HEK293-PSMB2-biotin, MEFs, and HeLa, CFTR- $\Delta$ F508-HeLa cells were grown in DMEM, whereas A549 cells were grown in RPMI 1640. All the culture media were supplemented with 10% of FBS, 100 U/mL penicillin, 100  $\mu\text{g}/\text{mL}$  streptomycin, and 2 mM L-glutamine. The cells were maintained in a humidified atmosphere containing 5% of  $\text{CO}_2$  at  $37^{\circ}\text{C}$ . *STUB1*<sup>-/-</sup> MEFs were established from homozygous *STUB1* null mice at embryonic day 12.5. Primary MEFs were then immortalized by transfecting Simian Virus 40 large T-antigen. For transient overexpression, cells were transfected with 1–2  $\mu\text{g}$  of total plasmid DNA in a 6-well culture plate (>95% confluent or at a density of  $10^6$  cells/well) for 36–48 h using Lipofectamine 3000 (Invitrogen), according to the manufacturer's guidelines. For amino acid starvation, the growth medium was replaced with EBSS after two washes with PBS.

### Immunofluorescence microscopy

For IFS analysis, cultured cells on a cover glass were fixed with 4% paraformaldehyde in PBS for 10 min. After that, the fixed cells were permeabilized with 0.5% (v/v) Triton X-100 in PBS, blocked with 2% BSA in PBS, and incubated with primary antibodies such as, for examples, the anti-SQSTM1 antibody (1:200 dilution) in the blocking solution for 1 h. Next, the cells were incubated for 40 min with Alexa Fluor 488– or Alexa Fluor 594–conjugated secondary antibodies diluted (1:1,000) for additional 1 h. The cells were then mounted with a 4',6'-diamidino-2-phenylindole (DAPI)-containing mounting solution (Abcam). Most of the fluorescent signals were monitored and captured using an Olympus fluorescence microscope (IX71) and images were processed using Adobe Photoshop CC. And confocal images were taken by laser scanning confocal microscope LSM 700 (Zeiss) under a 63x oil-immersion objective (c-Apochromat 63x/1.20 W Korr M27) at a definition of 1,024 x 1,024 pixels with the pinhole diameter adjusted to 1 AU. Then, images were analyzed by ZEN 2012 SP5 black edition image browser

(Release ver. 14.0.10.201). Within each figure, all images were captured using identical microscope settings and representative of the whole cell population.

### **Holotomography imaging**

For RI imaging, cells were plated on 50 mm imaging dishes with a #1.5H glass coverslip bottom (TomoDish, Tomocube) and stabilized in a 37 °C incubator for 24 h to maintain a confluence of approximately 60%. After 12 h of Mg132 treatment, the cells were washed twice with PBS, followed by replacement of the medium with a fresh complete medium. The light scattered by the cells was transmitted through an objective lens (UPLASAPO 60XW, Olympus) and was then recorded by a CMOS camera (FL3-U3-13Y3M-C, FLIR Systems). The camera was synchronized with the digital micro-mirror device to record 49 holograms of the sample illuminated at different angles. By a phase-retrieval algorithm, the amplitude and phase images of the cells were retrieved from the obtained holograms.

### **Sphericity quantification**

This analysis was performed with the TomoStudio software (ver. 2.7.30; Tomocube). The area of aggresomes corresponding to SQSTM1 antibody fluorescence was cropped, and the RI distribution of aggresomes was determined. Based on the threshold RI value, segmentation was performed using the Analysis tool in TomoStudio to create an iso-surface of the aggresomes. Volume and surface area of the iso-surface were used to calculate the sphericity of aggresomes. The protein concentration was also calculated in TomoStudio. The cytoplasmic protein concentrations are linearly proportional to their RI value via a constant called the RI increment.

### **Analysis of soluble and insoluble fractions**

Cultured cells were washed with ice-cold PBS and lysed with either Triton X-100 buffer (200 mM KCl, 20 mM 4-[2-hydroxyethyl]-1-piperazineethanesulfonic acid-KOH pH 7.9, 1 mM MgCl<sub>2</sub>, 1 mM EDTA, 1% of Triton X-100, and 10% of glycerol) or RIPA buffer (50 mM Tris-HCl pH 8, 1% of NP-40, 0.5% of deoxycholate, 0.1% of sodium dodecyl sulfate [SDS], and 150 mM NaCl), all supplemented with protease inhibitors. The lysates were then centrifuged at 16,000 × g for 30 min at 4 °C. The supernatants were designated as a detergent-soluble fraction. The pellets were washed with lysis buffer and resuspended in lysis buffer supplemented with 1% of SDS, then were sonicated for 10 s with a microtip sonicator, heated at 100 °C for 10 min, and were analyzed as a detergent-insoluble fraction. Equal volumes of each insoluble and soluble fraction were boiled for 10 min in SDS sample buffer and analyzed by IB.

### **RNA interference**

The siRNAs were synthesized by Genolution. Using G-fectin (Genolution) or RNAiMAX (Invitrogen), siRNA was transfected into cells following the manufacturer's protocols. The final concentration of siRNA for the transfection was 20 nM. After 48 h of the transfection, 5 μM MG132 treatment for 12 h and MG132 washout were conducted. The following siRNAs were employed in this study: as a control (5'-CCUCGUGCCGUUCCAUCAGGUAGUU-3' sense, 5'-CUACCUGAUGGAACGGCAGGAGUU-3' antisense), for HDAC6 (5'-GAAACAACCCAGUACAUGAUU-3' sense, 5'-UCAUGUACUGGGUUGUUUCUU-3' antisense), for SQSTM1 (5'-GACAUCUUCGAAUCUACAUU-3' sense, 5'-UGUAGAUUCGGAAGAUGUCUU-3' antisense), for ATG5 (5'-GCUAUAUCAGGAUGAGAUUU-3' sense, 5'-UAUCUCAUCCUGAUUAUAGCUU-3' antisense), for ATG7 (5'-GCUACUUCUGCAAUGAUGUUU-3' sense, 5'-ACAUCAUUGCAGAAGUAGCUU-3' antisense), for STUB1 (5'-CGCUG



GUGGCCGUGUAUUAUU-3' plus 5'-CUUCGAAUCGCGAAGAAGAUU-3' sense, 5'-UAAUACACGGCCACCAGCGUU-3' plus 5'-UCUUCUUCGCGAUUCGAAGUU-3' antisense), for BIRC6 (5'-CCUAGUUGCUCUUAUUCUUUU-3' sense, 5'-AAGAAUAGGAGCAACUAGGUU-3' antisense), for UBE3A (5'-CAAGAAAGGCGCUAGAAUUUU-3' plus 5'-CAACUCCUGCUCUGAGAUUU-3' sense, 5'-AAUUCUAGCGCCUUUCUUGUU-3' plus 5'-UAUCUCAGAGCAGGAGUUUGUU-3' antisense), for RNF181 (5'-CACUGAUGACGACACUUAUUU-3' sense, 5'-AUAAGUGUCGUCAUCAGUGUU-3' antisense), for UBR4 (5'-CAACAUCUGCCCUUCAAAUUU-3' sense, 5'-AUUUGAAGGGCAGAUGUUGUU-3' antisense), and for UBR5 (5'-GCUUGAUGAGCCAUAUAGAAUU-3' sense, 5'-UUCUAAUGGCUCAUCAAGCUU-3' antisense).

### **Quantitative RT-PCR**

Total RNA from cultured cells was isolated via the TRIzol Reagent (Invitrogen), followed by further purification by on-column DNase I treatment on RNeasy Mini-Columns (Qiagen). cDNA samples were prepared by reverse transcription with the Accupower RT-preMix (Bioneer). Then, quantitative RT-PCR reactions were carried out on a Rotor-Gene RG 3000 system (Corbett Research) with diluted cDNA and 10 pmol of target gene-specific primers. The SYBR qPCR master mixture (Kapa Biosystems) served as the reporter dye. Thermal cycling conditions included 95 °C for 3 min to allow for enzyme activation, followed by 40 cycles of 95 °C for 10 s, 53 °C for 15 s, and 72 °C for 30 s. The level of each mRNA was normalized to *GAPDH* levels of each cDNA sample, and the values were plotted as mean  $\pm$  SD of three independent experiments. The target gene-specific primer sequences were as follows: for PSMB5, forward 5'-ACTACGTGGACAGTGAAGGG-3' and reverse 5'-GGCATCTCTGTAGGTGGCTT-3'; for PSMD4, forward 5'-CTTCGTGTATCTATGGAA-3' and reverse 5'-TCATACTGCTTAGGTCAGG-3'; for PSMA7 forward 5'-AAGCAGCGTTATACGCAGAG-3' and reverse 5'-CATCAAAGTCGAAACCCACGAT-3'; for PSMA4, forward 5'-AGAAGTGGAGCAGTTGATCA-3' and reverse 5'-TCTCTGATTCTATTTATCCTTTTCT-3'; for PSMD4, forward 5'-AACAGTGAGTATATGCGGAATGG-3' and reverse 5'-ACTTCACAGTCATTAGCCAGTG-3'; for RSP27A, forward 5'-TCTCGACGAAGGCGACTAAT-3' and reverse 5'-TCGTGGTGGTGCTAAGAAAA-3'; for UBA52, forward 5'-AGGAGGGTATCCACCTGAC-3' and reverse 5'-CAGGGTGGACTCTTTCTGGA-3'; for UBC, forward 5'-CCTGGTGCTCCGTCTTAGAG-3' and reverse 5'-TTTCCAGCAAAGATCAACCT-3'; for UBB, forward 5'-TGCGTCTGAGAGGTGGTATG-3' and reverse 5'-GCCTTCACATTTTCGATGGT-3'; for SQSTM1, forward 5'-AAGCCGGGTGGGAATGTTG-3' and reverse 5'-CCTGAACAGTTATCCGACTCCAT-3'; for LC3, forward 5'-AACATGAGCGAGTTGGTCAAG-3' and reverse 5'-GCTCGTAGATGTCCGCGAT-3'; for ATG5, forward 5'-GCAAGCCAGACAGGAAAAAG-3' and reverse 5'-GACCTTCAGTGGTCCGGTAA-3'; for ATG12, forward 5'-CCCAGACCAAGAAGTTGGAA-3' and reverse 5'-GTCTCTTGCCACAAGCATCA-3'; and for GAPDH, forward 5'-GAGTCAACGGATTTGGTCGT-3' and reverse 5'-GACAAGCTTCCCGTTCTCAG-3'.

### **Purification of recombinant proteins and 26S human proteasomes**

Recombinant proteins were purified as previously described<sup>1, 2</sup>. Briefly, pGEX-4T-1-hSTUB1 was transfected into *Escherichia coli* BL21, and the resultant cultures were incubated at 37 °C until optical density at 600 nm (OD<sub>600</sub>) reached 0.5. After addition of 0.2 mM isopropyl  $\beta$ -d-1-thiogalactopyranoside, cells were cultured overnight at 20 °C with agitation. The cells were resuspended in lysis buffer (50 mM NaH<sub>2</sub>PO<sub>4</sub> pH 7.4, 300 mM NaCl, 20 mM  $\beta$ -mercaptoethanol, and 30% of glycerol) containing the

protease inhibitor cocktail and were lysed by sonication. After the lysate was centrifuged, the supernatant was incubated with Glutathione Sepharose (GE Healthcare) at 4 °C for 15 h. The resin was washed three times with washing buffer (lysis buffer with 0.2% of Triton X-100), then GST-hSTUB1 protein was eluted with 10 mM glutathione and concentrated on an Amicon ultracentrifugal filter (Millipore).

Human proteasome holoenzymes were isolated by affinity purification from a stable HEK293 cell line expressing biotin-tagged human PSMB2 as previously described with slight modifications<sup>2</sup>. The cells were cultured in 15 cm culture dishes, harvested with lysis buffer (50 mM NaH<sub>2</sub>PO<sub>4</sub> [pH 7.5], 100 mM NaCl, 10% of glycerol, 5 mM MgCl<sub>2</sub>, 0.5% of NP-40, 5 mM ATP, and 1 mM dithiothreitol) containing protease inhibitors, and were homogenized in a Dounce homogenizer. After that, the lysates were centrifuged at 16,000 × g for 15 min at 4 °C. Next, the supernatants were incubated with BioMag Streptavidin resin (Qiagen) for 6 h at 4 °C. The beads were washed with lysis buffer and TEV buffer (50 mM Tris-HCl [pH 7.5], 1 mM ATP, and 10% of glycerol). The 26S proteasomes were eluted from the resin by incubation with TEV protease (Invitrogen) in TEV buffer containing 1 mM ATP for 1 h at 30 °C. Then, the eluted proteasomes were concentrated using Amicon ultracentrifugal filters.

### **Measurement of proteasome activity and deubiquitinating activity**

Hydrolysis of fluorogenic peptide substrates suc-LLVY-AMC (Bachem) was quantified to determine the proteolytic activity of proteasomes. Briefly, the fluorogenic-peptide substrate hydrolysis assay was carried out with 10 µg of WCEs and 12.5 µM suc-LLVY-AMC. The reaction mixture contained 50 nM Tris-HCl pH 7.5, 1 mM EDTA, 1 mg/mL BSA, 1 mM ATP, and 1 mM DTT. Deubiquitinating activity was measured with hydrolysis of Ub-AMC (Boston Biochem). Proteasomal activity and deubiquitinating activity were monitored by measurement of free AMC fluorescence in a black 96-well plate on a TECAN Infinite m200 fluorometer.

### **Cell cycle analysis**

After the treatment with either dimethyl sulfoxide (DMSO) or MG132 for various periods at several concentrations, the cells were collected by trypsinization. Each pellet was washed three times with cold PBS and fixed in 70% ethanol at 4 °C overnight. They were then centrifuged at 200 × g for 5 min at room temperature. After that, each cell pellet was resuspended in PBS and incubated with the DAPI/Triton X-100 staining solution and RNase A (50 µg/mL, Sigma) at room temperature for 30 min in the dark. The cells were next analyzed by flow cytometry (BD LSRFortessa) with UV light excitation at 340 to 380 nm. Data analysis was performed in the Flowjo software.

### **Assessment of cell viability**

This property was assessed by the CellTiter-Glo Luminescent Cell Viability Assay (Promega) kit in accordance with the manufacturer's protocol. Briefly, cells were grown in black-wall/clear-bottom 96-well plates, treated with either MG132 (5 µM) or nocodazole (2 or 5 µM), and then luminescence substrates were added in the same volume as the cell culture medium. The mixture was incubated for 10 min at room temperature on a shaker, followed by luminescence measurement.

### **Nondenaturing gel electrophoresis**

Native gel analysis of purified proteasomes or cell lysates was performed largely as described before<sup>3</sup>. Briefly, samples were resolved by native PAGE using NuPAGE 3-8% Tris-Acetate Protein Gels (Thermo Fisher) at 150 V for 3–4 h. Then proteins in the gel were directly analyzed by in-gel suc-

LLVY-AMC hydrolysis assay, or transferred to polyvinylidene difluoride membranes and subsequently immunoblotted for proteasome subunits and proteasome-interacting proteins.

### **LC-MS/MS analysis**

LC-MS/MS analysis on a Q Exactive Plus Hybrid Quadrupole-Orbitrap mass spectrometer (Thermo Fisher Scientific) was performed as previously described<sup>4</sup>. Briefly, peptide samples were separated on a two-column system, consisting of a trap column and an analytical column (75  $\mu\text{m} \times 50 \text{ cm}$ ), with a 120 min gradient from 7% to 32% acetonitrile at 300 nL/min. Column temperature was maintained at 60 °C with a column heater. The MS/MS spectra were acquired at a resolution of 17,500 at  $m/z \approx 200$  with 30% of normalized collision energy. The maximum ion injection time for the full scan and MS/MS scan was 20 and 100 ms, respectively. The obtained raw MS data were processed in MaxQuant version 1.5.3.1, which was also employed for postacquisition precursor  $m/z$  calibration, MS/MS spectrum peak picking, and peptide quantification<sup>5</sup>. The MS/MS spectra were subjected to searches in the Human UniProt protein sequence database by means of the Andromeda search engine. Mass tolerance for precursor ions and MS/MS ions was set to 6 and 20 ppm, respectively. The global false discovery rate for the peptide, protein, and modification level was set to 1%.

For label-free quantification of proteasome-associated proteins, the iBAQ algorithm<sup>6</sup> was utilized as part of the MaxQuant platform. Briefly, the iBAQ values, which are the raw intensities divided by the number of theoretical peptides and proportional to the molar quantities of the proteins, were normalized to the average values of 14 CP subunits (PSMA1 to PSMA7 and PSMB1 to PSMB7). A DAP was considered statistically significant if its fold change was  $\geq 1.5$  and if it had a P value  $< 0.05$ . For a comparison of proteomes, two-sided *t* tests were performed with a significance level of 5%. All statistical analyses were performed in the Perseus software.

### **Size exclusion chromatography and sucrose-gradient ultracentrifugation**

Cell lysates were centrifuged twice at  $18,000 \times g$  for 30 min at 4 °C. The final supernatant of each condition was loaded (11 mg by protein) onto a column and eluted with proteasome SEC buffer (50 mM  $\text{NaH}_2\text{PO}_4$  [pH 7.5], 10 mM NaCl, 5 mM  $\text{MgCl}_2$ , 5 mM ATP, and 1 mM DTT). SEC was carried out on a Superose 6 Increase 10/300 GL column by fast protein liquid chromatography (Ä KTA; GE Healthcare); 0.25 mL fractions were collected, and 10% glycerol was added to each fraction. Each standard was prepared at a concentration of 3 mg/mL in PBS, and the standards were loaded onto a column simultaneously. Blue dextran ( $M_r$ : 2,000,000) peaked in fraction 36, thyroglobulin ( $M_r$ : 669,000) peaked in fraction 54, and ovalbumin ( $M_r$ : 44,000) in fraction 70.

For sucrose-gradient ultracentrifugation, HeLa cells were added by 15 mL of warm PBS containing 100  $\mu\text{g/mL}$  cycloheximide and kept for 15 min to immobilize ribosomes on mRNAs. After that, the cell extracts were resuspended with 1 mL of lysis buffer (50 mM 3-[N-morpholino]propanesulfonic acid, 15 mM  $\text{MgCl}_2$ , 150 mM NaCl, 100  $\mu\text{g/mL}$  cycloheximide, 0.5% of Triton X-100, 1 mg/mL heparin, 0.2 U/ $\mu\text{L}$  RNase inhibitor, 2 mM phenylmethylsulfonyl fluoride, and 1 mM benzamidine) and centrifuged. After harvesting, the soluble fraction was loaded on top of a pre-established sucrose gradient (10 mL, 10–50%) and centrifuged at 36,000 rpm in a Beckman SW-41 Ti rotor for 2 h at 4 °C. After that, gradients were fractionated and collected using the ISCO tube piercer (Brandel) and fraction collector (Bio-Rad) according to absorbance at 254 nm.

### ***In vitro* ubiquitylation of purified proteasomes**

For ubiquitylation of the purified proteasome, 50  $\mu\text{M}$  ubiquitin (Boston Biochem) or mutant ubiquitin (K11R, K48R, or K63R; Enzo), 150 nM UBE1 (UBPBio), and 1  $\mu\text{M}$  UBE2D2 (Boston Biochem) were

incubated for 10 min at room temperature in 1× ATP buffer (50 mM Tris-HCl [pH 7.4], 100 mM NaCl, 10% of glycerol, 5 mM DTT, 2 mM ATP, and 10 mM MgCl<sub>2</sub>). Then, 500 nM GST-STUB1 and 60 nM purified proteasome were added, and total reaction volume was brought to the necessary value with reaction buffer (50 mM Tris-HCl pH 7.4, 100 mM NaCl, and 10% of glycerol). The reactions were allowed to proceed for 4 h at 37 °C. The reactions were stopped by the addition of SDS sample buffer and then loaded on a gel for IB analysis.

To remove GST-STUB1 from the *in vitro* ubiquitylation reactions of the proteasome, reaction products were incubated with pre-equilibrated glutathione-sepharose 4B beads (GE Healthcare) with gentle rotation at room temperature for 2 h. Then, the beads and the supernatant were separated by brief centrifugation at 600 × *g*. The beads were washed 3 times with Ub reaction buffer (50 mM Tris-HCl [pH 7.4], 100 mM NaCl, and 10% glycerol). Proteins bound to the beads were resuspended in 2 × SDS sample buffer, boiled for 10 min, and loaded on a gel for IB analysis.

### **<sup>1</sup>H ligand-observed STD NMR screening**

For NMR screening, the protein buffer was exchanged by ultrafiltration with a solution of 50 mM NaCl, 10 mM potassium phosphate, and 0.1 mM NaN<sub>3</sub> (pH 7.0). In order to identify compounds that can bind to STUB1 protein, we employed <sup>1</sup>H ligand-observed NMR screening methods like the Saturation-Transfer Difference (STD) experiment with 2<sup>nd</sup> Generation BIONET Premium Fragment Library. Each fragment was stocked as 100 mM DMSO-*d*<sub>6</sub> solution. The STD NMR experiments were carried out at 293 K on an 800 MHz Bruker NMR spectrometer equipped with a cryoprobe. Preliminary STD NMR screenings were performed with a mixture of five different fragments. NMR samples (500 μL) for STD experiments were prepared with 1 mM of each fragment in 50 mM NaCl, 10 mM potassium phosphate, and 0.1 mM NaN<sub>3</sub> at pH 7.0 in D<sub>2</sub>O either in the presence or absence of 1 μM of STUB1. For fragments presenting the binding potential, secondary STD NMR experiments were carried out with the single fragment itself to confirm the binding.

### **Synthesis of compound 153**

To a solution of 5-bromo-6-methylpyridin-2-amine (100 mg, 0.54 mmol) in dioxane (7.1 mL) were added (3-chloro-5-(trifluoromethyl)phenyl)boronic acid (100 mg, 0.45 mmol) and 1 M aqueous solution of potassium carbonate (1.78 mL) at ambient temperature in a microwave vial. The resulting suspension was purged with nitrogen for 3 min, and bis(triphenylphosphine)palladium(II) dichloride (31.6 mg, 0.045 mmol) was added and the microwave vial was sealed with a microwave cap. Then, microwave was applied to the mixture at 120 °C for 3 h. The mixture was cooled down, diluted with ethyl acetate, and washed with water. The organic layer was dried with magnesium sulfate, filtered, and concentrated *in vacuo*. The residue was purified by preparative thin layer column chromatography (50% ethyl acetate-hexanes) to provide 5-(3-chloro-5-(trifluoromethyl)phenyl)-6-methylpyridin-2-amine (LSM153). <sup>1</sup>H-NMR (400 MHz, DMSO-*d*<sub>6</sub>): δ 7.78 (s, 1H), 7.72 (s, 1H), 7.62 (s, 1H), 7.33 (d, 1H, *J* = 8.0 Hz), 6.37 (d, 1H, *J* = 8.0 Hz), 6.11 (s, 2H), 2.25 (s, 3H). (30 mg; yield 23.5%).

## SUPPLEMENTARY REFERENCES

1. Seo, J. *et al.* CHIP controls necroptosis through ubiquitylation- and lysosome-dependent degradation of RIPK3. *Nat Cell Biol* **18**, 291-302 (2016).
2. Han, D.H. *et al.* Direct cellular delivery of human proteasomes to delay tau aggregation. *Nat Commun* **5**, 5633 (2014).
3. Choi, W.H. *et al.* Open-gate mutants of the mammalian proteasome show enhanced ubiquitin-conjugate degradation. *Nat Commun* **7**, 10963 (2016).
4. Han, D., Jin, J., Woo, J., Min, H. & Kim, Y. Proteomic analysis of mouse astrocytes and their secretome by a combination of FASP and StageTip-based, high pH, reversed-phase fractionation. *Proteomics* **14**, 1604-1609 (2014).
5. Tyanova, S. *et al.* The Perseus computational platform for comprehensive analysis of (prote)omics data. *Nat Methods* **13**, 731-740 (2016).
6. Schwanhaussner, B. *et al.* Global quantification of mammalian gene expression control. *Nature* **473**, 337-342 (2011).

## SUPPLEMENTARY TABLE

**Supplementary Table 1.** (a) All the proteins identified by iBAQ-MS. (b) Normalized quantities of the identified proteins based on the levels of CP subunits. (c) Proteins differentially associated with proteasomes after 6 h MG132 treatment. (d) Proteins differentially associated with proteasomes after 12 h MG132 treatment. Proteomic raw data are available via ProteomeXchange with identifier PXD019193.













|         |  |                                                                          |        |           |           |         |           |          |          |          |          |
|---------|--|--------------------------------------------------------------------------|--------|-----------|-----------|---------|-----------|----------|----------|----------|----------|
| P04033  |  | CAD-binding protein alpha chain                                          | CBPA   | 0         | 0         | 0       | 0         | 0        | 0        | 0        | 77445    |
| P04034  |  | 3-hydroxy-3-methylglutaryl-coenzyme A reductase                          | HMGCR  | 0         | 0         | 0       | 0         | 103710   | 862470   | 515600   | 387310   |
| P04040  |  | Catalase                                                                 | CAT    | 0         | 0         | 0       | 0         | 0        | 0        | 0        | 58065    |
| P04047  |  | Fructose-bisphosphate aldolase A                                         | ALDOA  | 131420000 | 120700000 | 8492900 | 126340000 | 38623000 | 42412000 | 68600000 | 48600000 |
| P104048 |  | Osmithine aminotransferase, mitochondrial                                | OAT    | 4586500   | 5770000   | 0       | 5277800   | 1274500  | 1154100  | 2875000  | 2875000  |
| P104049 |  | Tubulin beta-4A chain                                                    | TUBB4A | 0         | 0         | 0       | 0         | 0        | 0        | 0        | 0        |
| P104050 |  | Glyceroldehyde 3-phosphate dehydrogenase                                 | GAPDH  | 6195500   | 8792000   | 2421000 | 9150800   | 1834000  | 20617000 | 48629000 | 48629000 |
| P104051 |  | Alpha-amylase 2B                                                         | AMY2B  | 4278200   | 0         | 0       | 0         | 0        | 0        | 0        | 0        |
| P104052 |  | Heat shock protein beta 1                                                | HSPB1  | 2713400   | 2713400   | 1977800 | 2074100   | 1066500  | 570000   | 570000   | 570000   |
| P104053 |  | Dolichyl-diphosphooligosaccharide- protein glycosyltransferase subunit 1 | DPN1   | 541710    | 305000    | 0       | 0         | 168210   | 203970   | 330810   | 330810   |
| P104054 |  | Dolichyl-diphosphooligosaccharide- protein glycosyltransferase subunit 2 | DPN2   | 1141300   | 765400    | 448100  | 0         | 844800   | 0        | 0        | 0        |
| P104055 |  | Coenzyme nucleotide-binding protein G0 subunit alpha 2                   | GNAL2  | 2182000   | 0         | 666280  | 9321200   | 1815800  | 1814100  | 9333200  | 9333200  |
| P09876  |  | Histone H2A type 1-Histone H2A type 1                                    | H2A1   | 8289100   | 172220000 | 0       | 54629000  | 19577000 | 8783000  | 13668000 | 13668000 |
| P09877  |  | Histone H2A type 2-Histone H2A type 2                                    | H2A2   | 8289100   | 172220000 | 0       | 54629000  | 19577000 | 8783000  | 13668000 | 13668000 |
| P09878  |  | Histone H2A type 3-Histone H2A type 3                                    | H2A3   | 8289100   | 172220000 | 0       | 54629000  | 19577000 | 8783000  | 13668000 | 13668000 |
| P09879  |  | Histone H2A type 4-Histone H2A type 4                                    | H2A4   | 8289100   | 172220000 | 0       | 54629000  | 19577000 | 8783000  | 13668000 | 13668000 |
| P09880  |  | Histone H2A type 5-Histone H2A type 5                                    | H2A5   | 8289100   | 172220000 | 0       | 54629000  | 19577000 | 8783000  | 13668000 | 13668000 |
| P09881  |  | Histone H2A type 6-Histone H2A type 6                                    | H2A6   | 8289100   | 172220000 | 0       | 54629000  | 19577000 | 8783000  | 13668000 | 13668000 |
| P09882  |  | Histone H2A type 7-Histone H2A type 7                                    | H2A7   | 8289100   | 172220000 | 0       | 54629000  | 19577000 | 8783000  | 13668000 | 13668000 |
| P09883  |  | Histone H2A type 8-Histone H2A type 8                                    | H2A8   | 8289100   | 172220000 | 0       | 54629000  | 19577000 | 8783000  | 13668000 | 13668000 |
| P09884  |  | Histone H2A type 9-Histone H2A type 9                                    | H2A9   | 8289100   | 172220000 | 0       | 54629000  | 19577000 | 8783000  | 13668000 | 13668000 |
| P09885  |  | Histone H2A type 10-Histone H2A type 10                                  | H2A10  | 8289100   | 172220000 | 0       | 54629000  | 19577000 | 8783000  | 13668000 | 13668000 |
| P09886  |  | Histone H2A type 11-Histone H2A type 11                                  | H2A11  | 8289100   | 172220000 | 0       | 54629000  | 19577000 | 8783000  | 13668000 | 13668000 |
| P09887  |  | Histone H2A type 12-Histone H2A type 12                                  | H2A12  | 8289100   | 172220000 | 0       | 54629000  | 19577000 | 8783000  | 13668000 | 13668000 |
| P09888  |  | Histone H2A type 13-Histone H2A type 13                                  | H2A13  | 8289100   | 172220000 | 0       | 54629000  | 19577000 | 8783000  | 13668000 | 13668000 |
| P09889  |  | Histone H2A type 14-Histone H2A type 14                                  | H2A14  | 8289100   | 172220000 | 0       | 54629000  | 19577000 | 8783000  | 13668000 | 13668000 |
| P09890  |  | Histone H2A type 15-Histone H2A type 15                                  | H2A15  | 8289100   | 172220000 | 0       | 54629000  | 19577000 | 8783000  | 13668000 | 13668000 |
| P09891  |  | Histone H2A type 16-Histone H2A type 16                                  | H2A16  | 8289100   | 172220000 | 0       | 54629000  | 19577000 | 8783000  | 13668000 | 13668000 |
| P09892  |  | Histone H2A type 17-Histone H2A type 17                                  | H2A17  | 8289100   | 172220000 | 0       | 54629000  | 19577000 | 8783000  | 13668000 | 13668000 |
| P09893  |  | Histone H2A type 18-Histone H2A type 18                                  | H2A18  | 8289100   | 172220000 | 0       | 54629000  | 19577000 | 8783000  | 13668000 | 13668000 |
| P09894  |  | Histone H2A type 19-Histone H2A type 19                                  | H2A19  | 8289100   | 172220000 | 0       | 54629000  | 19577000 | 8783000  | 13668000 | 13668000 |
| P09895  |  | Histone H2A type 20-Histone H2A type 20                                  | H2A20  | 8289100   | 172220000 | 0       | 54629000  | 19577000 | 8783000  | 13668000 | 13668000 |
| P09896  |  | Histone H2B type 1-Histone H2B type 1                                    | H2B1   | 1714900   | 5704000   | 0       | 1667500   | 2211000  | 978480   | 2211000  | 978480   |
| P09897  |  | Histone H2B type 2-Histone H2B type 2                                    | H2B2   | 1714900   | 5704000   | 0       | 1667500   | 2211000  | 978480   | 2211000  | 978480   |
| P09898  |  | Histone H2B type 3-Histone H2B type 3                                    | H2B3   | 1714900   | 5704000   | 0       | 1667500   | 2211000  | 978480   | 2211000  | 978480   |
| P09899  |  | Histone H2B type 4-Histone H2B type 4                                    | H2B4   | 1714900   | 5704000   | 0       | 1667500   | 2211000  | 978480   | 2211000  | 978480   |
| P09900  |  | Histone H2B type 5-Histone H2B type 5                                    | H2B5   | 1714900   | 5704000   | 0       | 1667500   | 2211000  | 978480   | 2211000  | 978480   |
| P09901  |  | Histone H2B type 6-Histone H2B type 6                                    | H2B6   | 1714900   | 5704000   | 0       | 1667500   | 2211000  | 978480   | 2211000  | 978480   |
| P09902  |  | Histone H2B type 7-Histone H2B type 7                                    | H2B7   | 1714900   | 5704000   | 0       | 1667500   | 2211000  | 978480   | 2211000  | 978480   |
| P09903  |  | Histone H2B type 8-Histone H2B type 8                                    | H2B8   | 1714900   | 5704000   | 0       | 1667500   | 2211000  | 978480   | 2211000  | 978480   |
| P09904  |  | Histone H2B type 9-Histone H2B type 9                                    | H2B9   | 1714900   | 5704000   | 0       | 1667500   | 2211000  | 978480   | 2211000  | 978480   |
| P09905  |  | Histone H2B type 10-Histone H2B type 10                                  | H2B10  | 1714900   | 5704000   | 0       | 1667500   | 2211000  | 978480   | 2211000  | 978480   |
| P09906  |  | Histone H2B type 11-Histone H2B type 11                                  | H2B11  | 1714900   | 5704000   | 0       | 1667500   | 2211000  | 978480   | 2211000  | 978480   |
| P09907  |  | Histone H2B type 12-Histone H2B type 12                                  | H2B12  | 1714900   | 5704000   | 0       | 1667500   | 2211000  | 978480   | 2211000  | 978480   |
| P09908  |  | Histone H2B type 13-Histone H2B type 13                                  | H2B13  | 1714900   | 5704000   | 0       | 1667500   | 2211000  | 978480   | 2211000  | 978480   |
| P09909  |  | Histone H2B type 14-Histone H2B type 14                                  | H2B14  | 1714900   | 5704000   | 0       | 1667500   | 2211000  | 978480   | 2211000  | 978480   |
| P09910  |  | Histone H2B type 15-Histone H2B type 15                                  | H2B15  | 1714900   | 5704000   | 0       | 1667500   | 2211000  | 978480   | 2211000  | 978480   |
| P09911  |  | Histone H2B type 16-Histone H2B type 16                                  | H2B16  | 1714900   | 5704000   | 0       | 1667500   | 2211000  | 978480   | 2211000  | 978480   |
| P09912  |  | Histone H2B type 17-Histone H2B type 17                                  | H2B17  | 1714900   | 5704000   | 0       | 1667500   | 2211000  | 978480   | 2211000  | 978480   |
| P09913  |  | Histone H2B type 18-Histone H2B type 18                                  | H2B18  | 1714900   | 5704000   | 0       | 1667500   | 2211000  | 978480   | 2211000  | 978480   |
| P09914  |  | Histone H2B type 19-Histone H2B type 19                                  | H2B19  | 1714900   | 5704000   | 0       | 1667500   | 2211000  | 978480   | 2211000  | 978480   |
| P09915  |  | Histone H2B type 20-Histone H2B type 20                                  | H2B20  | 1714900   | 5704000   | 0       | 1667500   | 2211000  | 978480   | 2211000  | 978480   |
| P09916  |  | Histone H2B type 21-Histone H2B type 21                                  | H2B21  | 1714900   | 5704000   | 0       | 1667500   | 2211000  | 978480   | 2211000  | 978480   |
| P09917  |  | Histone H2B type 22-Histone H2B type 22                                  | H2B22  | 1714900   | 5704000   | 0       | 1667500   | 2211000  | 978480   | 2211000  | 978480   |
| P09918  |  | Histone H2B type 23-Histone H2B type 23                                  | H2B23  | 1714900   | 5704000   | 0       | 1667500   | 2211000  | 978480   | 2211000  | 978480   |
| P09919  |  | Histone H2B type 24-Histone H2B type 24                                  | H2B24  | 1714900   | 5704000   | 0       | 1667500   | 2211000  | 978480   | 2211000  | 978480   |
| P09920  |  | Histone H2B type 25-Histone H2B type 25                                  | H2B25  | 1714900   | 5704000   | 0       | 1667500   | 2211000  | 978480   | 2211000  | 978480   |
| P09921  |  | Histone H2B type 26-Histone H2B type 26                                  | H2B26  | 1714900   | 5704000   | 0       | 1667500   | 2211000  | 978480   | 2211000  | 978480   |
| P09922  |  | Histone H2B type 27-Histone H2B type 27                                  | H2B27  | 1714900   | 5704000   | 0       | 1667500   | 2211000  | 978480   | 2211000  | 978480   |
| P09923  |  | Histone H2B type 28-Histone H2B type 28                                  | H2B28  | 1714900   | 5704000   | 0       | 1667500   | 2211000  | 978480   | 2211000  | 978480   |
| P09924  |  | Histone H2B type 29-Histone H2B type 29                                  | H2B29  | 1714900   | 5704000   | 0       | 1667500   | 2211000  | 978480   | 2211000  | 978480   |
| P09925  |  | Histone H2B type 30-Histone H2B type 30                                  | H2B30  | 1714900   | 5704000   | 0       | 1667500   | 2211000  | 978480   | 2211000  | 978480   |
| P09926  |  | Histone H2B type 31-Histone H2B type 31                                  | H2B31  | 1714900   | 5704000   | 0       | 1667500   | 2211000  | 978480   | 2211000  | 978480   |
| P09927  |  | Histone H2B type 32-Histone H2B type 32                                  | H2B32  | 1714900   | 5704000   | 0       | 1667500   | 2211000  | 978480   | 2211000  | 978480   |
| P09928  |  | Histone H2B type 33-Histone H2B type 33                                  | H2B33  | 1714900   | 5704000   | 0       | 1667500   | 2211000  | 978480   | 2211000  | 978480   |
| P09929  |  | Histone H2B type 34-Histone H2B type 34                                  | H2B34  | 1714900   | 5704000   | 0       | 1667500   | 2211000  | 978480   | 2211000  | 978480   |
| P09930  |  | Histone H2B type 35-Histone H2B type 35                                  | H2B35  | 1714900   | 5704000   | 0       | 1667500   | 2211000  | 978480   | 2211000  | 978480   |
| P09931  |  | Histone H2B type 36-Histone H2B type 36                                  | H2B36  | 1714900   | 5704000   | 0       | 1667500   | 2211000  | 978480   | 2211000  | 978480   |
| P09932  |  | Histone H2B type 37-Histone H2B type 37                                  | H2B37  | 1714900   | 5704000   | 0       | 1667500   | 2211000  | 978480   | 2211000  | 978480   |
| P09933  |  | Histone H2B type 38-Histone H2B type 38                                  | H2B38  | 1714900   | 5704000   | 0       | 1667500   | 2211000  | 978480   | 2211000  | 978480   |
| P09934  |  | Histone H2B type 39-Histone H2B type 39                                  | H2B39  | 1714900   | 5704000   | 0       | 1667500   | 2211000  | 978480   | 2211000  | 978480   |
| P09935  |  | Histone H2B type 40-Histone H2B type 40                                  | H2B40  | 1714900   | 5704000   | 0       | 1667500   | 2211000  | 978480   | 2211000  | 978480   |
| P09936  |  | Histone H2B type 41-Histone H2B type 41                                  | H2B41  | 1714900   | 5704000   | 0       | 1667500   | 2211000  | 978480   | 2211000  | 978480   |
| P09937  |  | Histone H2B type 42-Histone H2B type 42                                  | H2B42  | 1714900   | 5704000   | 0       | 1667500   | 2211000  | 978480   | 2211000  | 978480   |
| P09938  |  | Histone H2B type 43-Histone H2B type 43                                  | H2B43  | 1714900   | 5704000   | 0       | 1667500   | 2211000  | 978480   | 2211000  | 978480   |
| P09939  |  | Histone H2B type 44-Histone H2B type 44                                  | H2B44  | 1714900   | 5704000   | 0       | 1667500   | 2211000  | 978480   | 2211000  | 978480   |
| P09940  |  | Histone H2B type 45-Histone H2B type 45                                  | H2B45  | 1714900   | 5704000   | 0       | 1667500   | 2211000  | 978480   | 2211000  | 978480   |
| P09941  |  | Histone H2B type 46-Histone H2B type 46                                  | H2B46  | 1714900   | 5704000   | 0       | 1667500   | 2211000  | 978480   | 2211000  | 978480   |
| P09942  |  | Histone H2B type 47-Histone H2B type 47                                  | H2B47  | 1714900   | 5704000   | 0       | 1667500   | 2211000  | 978480   | 2211000  | 978480   |
| P09943  |  | Histone H2B type 48-Histone H2B type 48                                  | H2B48  | 1714900   | 5704000   | 0       | 1667500   | 2211000  | 978480   | 2211000  | 978480   |
| P09944  |  | Histone H2B type 49-Histone H2B type 49                                  | H2B49  | 1714900   | 5704000   | 0       | 1667500   | 2211000  | 978480   | 2211000  | 978480   |
| P09945  |  | Histone H2B type 50                                                      |        |           |           |         |           |          |          |          |          |













|        |        |                                                                                 |              |         |         |         |          |          |         |         |
|--------|--------|---------------------------------------------------------------------------------|--------------|---------|---------|---------|----------|----------|---------|---------|
| Q2016  |        | Translational activator GCV1                                                    | GCN1L1       | 15966   | 0       | 0       | 23890    | 0        | 0       | 0       |
| Q2017  | Q2017  | Nuclear pore complex protein Nup55                                              | NUP55        | 24550   | 321500  | 454440  | 439700   | 370100   | 291400  | 291400  |
| Q2065  |        | 28S ribosomal protein S31, mitochondrial                                        | MRPS31       | 419670  | 0       | 0       | 40220    | 0        | 0       | 341400  |
| Q2068  | Q2068  | Acidic leucine-rich nuclear phosphoprotein 32 family member B                   | ANP32B       | 1772000 | 2462000 | 6617700 | 18613000 | 30150000 | 7317800 | 8942700 |
| Q2071  | Q2071  | Actin-related protein 23, cytoskeletal 1A                                       | ARPC1A       | 1366500 | 0       | 0       | 130700   | 1302000  | 2954000 | 0       |
| Q20769 |        | Histone deacetylase 2, histone deacetylase 1                                    | HDAC2,HDAC1  | 1599900 | 1494800 | 24396   | 5113100  | 2531001  | 1103700 | 1738100 |
| Q2077  | Q2077  | Synapsin                                                                        | SYNAP        | 73846   | 0       | 0       | 167900   | 0        | 0       | 640190  |
| Q20820 |        | Gamma-glutamyl hydrolase                                                        | GGH          | 0       | 294510  | 0       | 686800   | 0        | 0       | 0       |
| Q20828 |        | Coronin-2A                                                                      | COR2A        | 46810   | 0       | 0       | 0        | 0        | 16681   | 48238   |
| Q2083  | Q2083  | DNA repair protein RAD50                                                        | RAD50        | 38054   | 38054   | 56662   | 2461010  | 1411200  | 184880  | 1411200 |
| Q20900 | Q20900 | Regulator of nonsense transcripts 1                                             | RNT1         | 1400700 | 65470   | 138140  | 1075700  | 181180   | 31990   | 31990   |
| Q20913 | Q20913 | COPII signalosome complex subunit 5                                             | COPI1        | 154840  | 108500  | 0       | 222900   | 54350    | 1170200 | 80770   |
| Q20917 |        | G patch domain and KOW motif-containing protein                                 | GPWOW        | 64410   | 0       | 0       | 2100     | 0        | 38130   | 0       |
| Q20924 | Q20924 | Far upstream element-binding protein 2                                          | KHSBP        | 1256600 | 532800  | 1193700 | 1625700  | 376990   | 3025200 | 942620  |
| Q20925 | Q20925 | Transcription factor 12                                                         | TNFR1        | 201600  | 99368   | 0       | 605800   | 0        | 340700  | 0       |
| Q20925 | Q20925 | Ubiquitin carboxyl-terminal hydrolase 13                                        | UBP13        | 0       | 0       | 0       | 245130   | 0        | 0       | 0       |
| Q20938 | Q20938 | Probable ubiquitin carboxyl-terminal hydrolase FAX-X                            | USP9X        | 38154   | 38074   | 0       | 161900   | 0        | 99715   | 147680  |
| Q20939 | Q20939 | Ubiquitin carboxyl-terminal hydrolase 13, ubiquitin carboxyl-terminal hydrolase | USP7         | 65510   | 0       | 141000  | 2160200  | 56382    | 203660  | 118500  |
| Q20940 |        | Protein RING1B                                                                  | RING1B       | 3233300 | 3233300 | 3391000 | 4132700  | 2500000  | 913300  | 4423700 |
| Q20948 |        | Protein RING1A                                                                  | RING1A       | 3233300 | 3233300 | 3391000 | 4132700  | 2500000  | 913300  | 4423700 |
| Q20952 | Q20952 | Ubiquitin-conjugating enzyme E2, E2UBiquitin-conjugating enzyme E2              | UBE2E,UBE2E2 | 396960  | 246480  | 0       | 413600   | 0        | 466800  | 2780700 |
| Q20953 |        | Protein RING1B                                                                  | RING1B       | 3233300 | 3233300 | 3391000 | 4132700  | 2500000  | 913300  | 4423700 |
| Q20953 | Q20953 | Protein RING1A                                                                  | RING1A       | 3233300 | 3233300 | 3391000 | 4132700  | 2500000  | 913300  | 4423700 |
| Q20953 | Q20953 | Protein RING1B                                                                  | RING1B       | 3233300 | 3233300 | 3391000 | 4132700  | 2500000  | 913300  | 4423700 |
| Q20953 | Q20953 | Protein RING1A                                                                  | RING1A       | 3233300 | 3233300 | 3391000 | 4132700  | 2500000  | 913300  | 4423700 |
| Q20953 | Q20953 | Protein RING1B                                                                  | RING1B       | 3233300 | 3233300 | 3391000 | 4132700  | 2500000  | 913300  | 4423700 |
| Q20953 | Q20953 | Protein RING1A                                                                  | RING1A       | 3233300 | 3233300 | 3391000 | 4132700  | 2500000  | 913300  | 4423700 |
| Q20953 | Q20953 | Protein RING1B                                                                  | RING1B       | 3233300 | 3233300 | 3391000 | 4132700  | 2500000  | 913300  | 4423700 |
| Q20953 | Q20953 | Protein RING1A                                                                  | RING1A       | 3233300 | 3233300 | 3391000 | 4132700  | 2500000  | 913300  | 4423700 |
| Q20953 | Q20953 | Protein RING1B                                                                  | RING1B       | 3233300 | 3233300 | 3391000 | 4132700  | 2500000  | 913300  | 4423700 |
| Q20953 | Q20953 | Protein RING1A                                                                  | RING1A       | 3233300 | 3233300 | 3391000 | 4132700  | 2500000  | 913300  | 4423700 |
| Q20953 | Q20953 | Protein RING1B                                                                  | RING1B       | 3233300 | 3233300 | 3391000 | 4132700  | 2500000  | 913300  | 4423700 |
| Q20953 | Q20953 | Protein RING1A                                                                  | RING1A       | 3233300 | 3233300 | 3391000 | 4132700  | 2500000  | 913300  | 4423700 |
| Q20953 | Q20953 | Protein RING1B                                                                  | RING1B       | 3233300 | 3233300 | 3391000 | 4132700  | 2500000  | 913300  | 4423700 |
| Q20953 | Q20953 | Protein RING1A                                                                  | RING1A       | 3233300 | 3233300 | 3391000 | 4132700  | 2500000  | 913300  | 4423700 |
| Q20953 | Q20953 | Protein RING1B                                                                  | RING1B       | 3233300 | 3233300 | 3391000 | 4132700  | 2500000  | 913300  | 4423700 |
| Q20953 | Q20953 | Protein RING1A                                                                  | RING1A       | 3233300 | 3233300 | 3391000 | 4132700  | 2500000  | 913300  | 4423700 |
| Q20953 | Q20953 | Protein RING1B                                                                  | RING1B       | 3233300 | 3233300 | 3391000 | 4132700  | 2500000  | 913300  | 4423700 |
| Q20953 | Q20953 | Protein RING1A                                                                  | RING1A       | 3233300 | 3233300 | 3391000 | 4132700  | 2500000  | 913300  | 4423700 |
| Q20953 | Q20953 | Protein RING1B                                                                  | RING1B       | 3233300 | 3233300 | 3391000 | 4132700  | 2500000  | 913300  | 4423700 |
| Q20953 | Q20953 | Protein RING1A                                                                  | RING1A       | 3233300 | 3233300 | 3391000 | 4132700  | 2500000  | 913300  | 4423700 |
| Q20953 | Q20953 | Protein RING1B                                                                  | RING1B       | 3233300 | 3233300 | 3391000 | 4132700  | 2500000  | 913300  | 4423700 |
| Q20953 | Q20953 | Protein RING1A                                                                  | RING1A       | 3233300 | 3233300 | 3391000 | 4132700  | 2500000  | 913300  | 4423700 |
| Q20953 | Q20953 | Protein RING1B                                                                  | RING1B       | 3233300 | 3233300 | 3391000 | 4132700  | 2500000  | 913300  | 4423700 |
| Q20953 | Q20953 | Protein RING1A                                                                  | RING1A       | 3233300 | 3233300 | 3391000 | 4132700  | 2500000  | 913300  | 4423700 |
| Q20953 | Q20953 | Protein RING1B                                                                  | RING1B       | 3233300 | 3233300 | 3391000 | 4132700  | 2500000  | 913300  | 4423700 |
| Q20953 | Q20953 | Protein RING1A                                                                  | RING1A       | 3233300 | 3233300 | 3391000 | 4132700  | 2500000  | 913300  | 4423700 |
| Q20953 | Q20953 | Protein RING1B                                                                  | RING1B       | 3233300 | 3233300 | 3391000 | 4132700  | 2500000  | 913300  | 4423700 |
| Q20953 | Q20953 | Protein RING1A                                                                  | RING1A       | 3233300 | 3233300 | 3391000 | 4132700  | 2500000  | 913300  | 4423700 |
| Q20953 | Q20953 | Protein RING1B                                                                  | RING1B       | 3233300 | 3233300 | 3391000 | 4132700  | 2500000  | 913300  | 4423700 |
| Q20953 | Q20953 | Protein RING1A                                                                  | RING1A       | 3233300 | 3233300 | 3391000 | 4132700  | 2500000  | 913300  | 4423700 |
| Q20953 | Q20953 | Protein RING1B                                                                  | RING1B       | 3233300 | 3233300 | 3391000 | 4132700  | 2500000  | 913300  | 4423700 |
| Q20953 | Q20953 | Protein RING1A                                                                  | RING1A       | 3233300 | 3233300 | 3391000 | 4132700  | 2500000  | 913300  | 4423700 |
| Q20953 | Q20953 | Protein RING1B                                                                  | RING1B       | 3233300 | 3233300 | 3391000 | 4132700  | 2500000  | 913300  | 4423700 |
| Q20953 | Q20953 | Protein RING1A                                                                  | RING1A       | 3233300 | 3233300 | 3391000 | 4132700  | 2500000  | 913300  | 4423700 |
| Q20953 | Q20953 | Protein RING1B                                                                  | RING1B       | 3233300 | 3233300 | 3391000 | 4132700  | 2500000  | 913300  | 4423700 |
| Q20953 | Q20953 | Protein RING1A                                                                  | RING1A       | 3233300 | 3233300 | 3391000 | 4132700  | 2500000  | 913300  | 4423700 |
| Q20953 | Q20953 | Protein RING1B                                                                  | RING1B       | 3233300 | 3233300 | 3391000 | 4132700  | 2500000  | 913300  | 4423700 |
| Q20953 | Q20953 | Protein RING1A                                                                  | RING1A       | 3233300 | 3233300 | 3391000 | 4132700  | 2500000  | 913300  | 4423700 |
| Q20953 | Q20953 | Protein RING1B                                                                  | RING1B       | 3233300 | 3233300 | 3391000 | 4132700  | 2500000  | 913300  | 4423700 |
| Q20953 | Q20953 | Protein RING1A                                                                  | RING1A       | 3233300 | 3233300 | 3391000 | 4132700  | 2500000  | 913300  | 4423700 |
| Q20953 | Q20953 | Protein RING1B                                                                  | RING1B       | 3233300 | 3233300 | 3391000 | 4132700  | 2500000  | 913300  | 4423700 |
| Q20953 | Q20953 | Protein RING1A                                                                  | RING1A       | 3233300 | 3233300 | 3391000 | 4132700  | 2500000  | 913300  | 4423700 |
| Q20953 | Q20953 | Protein RING1B                                                                  | RING1B       | 3233300 | 3233300 | 3391000 | 4132700  | 2500000  | 913300  | 4423700 |
| Q20953 | Q20953 | Protein RING1A                                                                  | RING1A       | 3233300 | 3233300 | 3391000 | 4132700  | 2500000  | 913300  | 4423700 |
| Q20953 | Q20953 | Protein RING1B                                                                  | RING1B       | 3233300 | 3233300 | 3391000 | 4132700  | 2500000  | 913300  | 4423700 |
| Q20953 | Q20953 | Protein RING1A                                                                  | RING1A       | 3233300 | 3233300 | 3391000 | 4132700  | 2500000  | 913300  | 4423700 |
| Q20953 | Q20953 | Protein RING1B                                                                  | RING1B       | 3233300 | 3233300 | 3391000 | 4132700  | 2500000  | 913300  | 4423700 |
| Q20953 | Q20953 | Protein RING1A                                                                  | RING1A       | 3233300 | 3233300 | 3391000 | 4132700  | 2500000  | 913300  | 4423700 |
| Q20953 | Q20953 | Protein RING1B                                                                  | RING1B       | 3233300 | 3233300 | 3391000 | 4132700  | 2500000  | 913300  | 4423700 |
| Q20953 | Q20953 | Protein RING1A                                                                  | RING1A       | 3233300 | 3233300 | 3391000 | 4132700  | 2500000  | 913300  | 4423700 |
| Q20953 | Q20953 | Protein RING1B                                                                  | RING1B       | 3233300 | 3233300 | 3391000 | 4132700  | 2500000  | 913300  | 4423700 |
| Q20953 | Q20953 | Protein RING1A                                                                  | RING1A       | 3233300 | 3233300 | 3391000 | 4132700  | 2500000  | 913300  | 4423700 |
| Q20953 | Q20953 | Protein RING1B                                                                  | RING1B       | 3233300 | 3233300 | 3391000 | 4132700  | 2500000  | 913300  | 4423700 |
| Q20953 | Q20953 | Protein RING1A                                                                  | RING1A       | 3233300 | 3233300 | 3391000 | 4132700  | 2500000  | 913300  | 4423700 |
| Q20953 | Q20953 | Protein RING1B                                                                  | RING1B       | 3233300 | 3233300 | 3391000 | 4132700  | 2500000  | 913300  | 4423700 |
| Q20953 | Q20953 | Protein RING1A                                                                  | RING1A       | 3233300 | 3233300 | 3391000 | 4132700  | 2500000  | 913300  | 4423700 |
| Q20953 | Q20953 | Protein RING1B                                                                  | RING1B       | 3233300 | 3233300 | 3391000 | 4132700  | 2500000  | 913300  | 4423700 |
| Q20953 | Q20953 | Protein RING1A                                                                  | RING1A       | 3233300 | 3233300 | 3391000 | 4132700  | 2500000  | 913300  | 4423700 |
| Q20953 | Q20953 | Protein RING1B                                                                  | RING1B       | 3233300 | 3233300 | 3391000 | 4132700  | 2500000  | 913300  | 4423700 |
| Q20953 | Q20953 | Protein RING1A                                                                  | RING1A       | 3233300 | 3233300 | 3391000 | 4132700  | 2500000  | 913300  | 4423700 |
| Q20953 | Q20953 | Protein RING1B                                                                  | RING1B       | 3233300 | 3233300 | 3391000 | 4132700  | 2500000  | 913300  | 4423700 |
| Q20953 | Q20953 | Protein RING1A                                                                  | RING1A       | 3233300 | 3233300 | 3391000 | 4132700  | 2500000  | 913300  | 4423700 |
| Q20953 | Q20953 | Protein RING1B                                                                  | RING1B       | 3233300 | 3233300 | 3391000 | 4132700  | 2500000  | 913300  | 4423700 |
| Q20953 | Q20953 | Protein RING1A                                                                  | RING1A       | 3233300 | 3233300 | 3391000 | 4132700  | 2500000  | 913300  | 4423700 |
| Q20953 | Q20953 | Protein RING1B                                                                  | RING1B       | 3233300 | 3233300 | 3391000 | 4132700  | 2500000  | 913300  | 4423700 |
| Q20953 | Q20953 | Protein RING1A                                                                  | RING1A       | 3233300 | 3233300 | 3391000 | 4132700  | 2500000  | 913300  | 4423700 |
| Q20953 | Q20953 | Protein RING1B                                                                  | RING1B       | 3233300 | 3233300 | 3391000 | 4132700  | 2500000  | 913300  | 4423700 |
| Q20953 | Q20953 | Protein RING1A                                                                  | RING1A       | 3233300 | 3233300 | 3391000 | 4132700  | 2500000  | 913300  | 4423700 |
| Q209   |        |                                                                                 |              |         |         |         |          |          |         |         |



|        |                                                               |         |          |           |         |          |           |          |          |
|--------|---------------------------------------------------------------|---------|----------|-----------|---------|----------|-----------|----------|----------|
| Q9Y2W1 | Thyroid hormone receptor-associated protein 3                 | THRAP3  | 31167    | 48083     | 85933   | 0        | 0         | 125530   | 0        |
| Q9Y2X1 | Nucleolar protein 58                                          | NCP58   | 23260    | 59560     | 0       | 0        | 59940     | 369390   | 79650    |
| Q9Y2Z0 | Suppressor of G2 allele of SKP1 homolog                       | SLUG1   | 91010    | 0         | 484360  | 0        | 0         | 0        | 339280   |
| Q9Y133 | UR siRNA-associated 5m-like protein L5m2                      | LSM2    | 0        | 0         | 6688900 | 0        | 0         | 0        | 0        |
| Q9Y1B3 | Putative RNA-binding protein Luc7-like 2                      | LUC7L2  | 830640   | 1435200   | 782050  | 970330   | 1038700   | 1950900  | 1247600  |
| Q9Y1A4 | Ribosomal RNA-processing protein 7 homolog A                  | RBP7A   | 210450   | 0         | 0       | 0        | 535380    | 0        | 0        |
| Q9Y1B4 | Splicing factor 3B subunit 6                                  | SF3B6   | 706490   | 3386500   | 3176000 | 4259600  | 15483000  | 3668200  | 1507200  |
| Q9Y1B7 | 39S ribosomal protein L11, mitochondrial                      | MRPL11  | 955790   | 0         | 0       | 0        | 0         | 0        | 0        |
| Q9Y1B9 | RBP15-like protein                                            | RBP15   | 271540   | 1019300   | 0       | 0        | 827970    | 0        | 0        |
| Q9Y1C1 | Nucleolar protein 16                                          | NCP16   | 606960   | 1661500   | 0       | 0        | 3049500   | 0        | 0        |
| Q9Y1C6 | Peptidyl-prolyl cis-trans isomerase-like 1                    | PPI1    | 1415000  | 1878000   | 3731000 | 17819000 | 3701000   | 9662100  | 9260800  |
| Q9Y1A4 | Serine-threonine kinase receptor-associated protein           | STRAP   | 1916000  | 1578000   | 5895400 | 29381000 | 11580000  | 16237000 | 22058000 |
| Q9Y1D0 | HR23-like splicing ligase Rb28 homolog                        | RT1CB   | 1035500  | 2276100   | 0       | 0        | 948210    | 0        | 0        |
| Q9Y1H1 | F box only protein 7                                          | FBOX7   | 352870   | 1326600   | 2421800 | 2133300  | 0         | 725140   | 100280   |
| Q9Y1F9 | Nuclear complex protein 2 homolog                             | NCC2L   | 0        | 0         | 0       | 0        | 355800    | 0        | 0        |
| Q9Y1U8 | 60S ribosomal protein L36                                     | RPL36   | 45495000 | 412100000 | 0       | 41492000 | 387000000 | 8986600  | 44189000 |
| M870D  | Chromatin target of PRMT1 protein                             | CHTOP   | 1512600  | 2210400   | 0       | 0        | 2515400   | 0        | 0        |
| Q9Y1G0 | HBS1-like protein                                             | HBS1L   | 566630   | 846570    | 0       | 38607    | 352390    | 184090   | 110690   |
| Q9Y1G2 | Talin-1                                                       | TN1     | 432070   | 21340     | 0       | 426870   | 23842     | 39431    | 294400   |
| Q9Y1C2 | TRPM8 channel-associated factor 1                             | TCAF1   | 0        | 0         | 126430  | 746590   | 510100    | 218580   | 469350   |
| Q9Y1B3 | Ubiquitin carboxyl-terminal hydrolase 15                      | USP15   | 679540   | 121430    | 98076   | 1540500  | 323480    | 411470   | 993050   |
| Q9Y1A5 | E3 ubiquitin-protein ligase RNF115                            | RNF115  | 0        | 0         | 0       | 1132600  | 789020    | 563470   | 516230   |
| Q9Y1W2 | Ribosomal biogenesis protein LAST1                            | LAST1   | 618830   | 879380    | 0       | 222040   | 738520    | 0        | 125310   |
| Y555E  | UR siRNA-associated 5m-like protein L5m4                      | LSM4    | 4601700  | 13341000  | 168290  | 23424200 | 2452000   | 4634700  | 10386000 |
| Q9Y1B6 | PAX3- and PAX7-binding protein 1                              | PAXBP1  | 0        | 0         | 660380  | 0        | 311820    | 706370   | 112570   |
| Q9Y1B8 | Nucleoside diphosphate kinase 7                               | NME7    | 145500   | 389650    | 0       | 39200    | 1176500   | 2020900  | 337230   |
| Q9Y1B2 | FACT complex subunit SP16                                     | SUPT16H | 1207100  | 1492500   | 0       | 0        | 214880    | 0        | 0        |
| Q9Y1A9 | Mitochondrial import inner membrane translocase subunit Tim8B | TIM8B   | 3304400  | 3077100   | 1880300 | 0        | 4932300   | 3113400  | 1317300  |
| Q9Y1A1 | Mitochondrial import inner membrane translocase subunit Tim13 | TIM13   | 2105000  | 1803800   | 0       | 2462300  | 9647000   | 11169000 | 11447000 |
| Q9Y1B4 | Signal recognition particle receptor subunit beta             | SRFBP2  | 2224400  | 52450     | 0       | 2399710  | 404170    | 0        | 65500    |
| Q9Y1A3 | Mannose-1-phosphate guanylyltransferase beta                  | GMPFB   | 423910   | 0         | 0       | 0        | 0         | 153560   | 0        |
| Q9Y1C9 | General transcription factor 3C, polypeptide 3                | GTF3C3  | 0        | 0         | 0       | 0        | 0         | 81679    | 0        |
| Q9Y1S9 | RNA-binding protein 8A                                        | RBMA8   | 1749000  | 2095100   | 3810600 | 21271000 | 9419900   | 5804400  | 8417300  |
| Q9Y1T5 | Ubiquitin carboxyl-terminal hydrolase 16                      | USP16   | 381400   | 529800    | 0       | 86584    | 937590    | 0        | 0        |
| Q9Y1C0 | Melanoma-associated antigen D1                                | MAGEE1  | 0        | 0         | 0       | 153540   | 109170    | 82745    | 50578    |
| Q9Y1Z4 | Heme-binding protein 2                                        | HEBP2   | 2425800  | 0         | 0       | 2326900  | 355700    | 615000   | 1664400  |
| Q9Y1G8 | Leucine-rich repeat flightless-interacting protein 2          | LRRIP2  | 9279300  | 6143100   | 8708900 | 13878000 | 10579000  | 10739000 | 10760000 |
| Q9Y1T7 | Phosphoserine aminotransferase                                | PSAT1   | 1025000  | 3604700   | 147150  | 11132000 | 1129600   | 2396600  | 7567200  |
| Q9Y1E7 | Spindlin-1                                                    | SPIN1   | 336980   | 1093900   | 0       | 0        | 0         | 77081    | 0        |
| Q9Y1W6 | 28S ribosomal protein S18b, mitochondrial                     | MRP518B | 724670   | 1254000   | 0       | 283500   | 1649300   | 0        | 448070   |
| Q9Y1T8 | Coatomer subunit gamma-1                                      | COG1    | 231830   | 0         | 0       | 264070   | 0         | 0        | 0        |
| Q9Y1E6 | Chloride intracellular channel protein 4                      | CLIC4   | 2225900  | 1868600   | 0       | 344890   | 0         | 0        | 1958800  |
| Q9Y1A4 | Cilia- and flagella-associated protein 20                     | CFAP20  | 0        | 817470    | 220030  | 0        | 123430    | 2032400  | 514000   |
| Q9Y1E3 | Adrenalin                                                     | SCN     | 1394400  | 0         | 0       | 168320   | 415340    | 387750   | 519300   |
| Q9Y1V7 | Probable ATP-dependent RNA helicase DDX49                     | DDX49   | 0        | 866740    | 0       | 0        | 534340    | 0        | 0        |
| Q9Y1B8 | SIC23-interacting protein                                     | SIC23IP | 161840   | 0         | 0       | 0        | 0         | 0        | 88257    |
| M870E  | Apoptotic chromatin condensation inducer in the nucleus       | ACIN1   | 374040   | 796600    | 44907   | 67117    | 61495     | 35087    | 0        |
| M870A5 | Histone deacetylase complex subunit SAP18                     | SAP18   | 169730   | 0         | 0       | 1215500  | 590750    | 0        | 0        |









































| Gene                                              | Protein                                                                            | UniProt    | Ensembl     | RefSeq      | NCBI        | KEGG        | UniProt     | Ensembl     | RefSeq      | NCBI        | KEGG        | UniProt      | Ensembl       | RefSeq        | NCBI          | KEGG          |
|---------------------------------------------------|------------------------------------------------------------------------------------|------------|-------------|-------------|-------------|-------------|-------------|-------------|-------------|-------------|-------------|--------------|---------------|---------------|---------------|---------------|
| BRWV6C20WV6-2QBW6W                                | See family domain-containing protein 1                                             | SCZ1       | 0.000170044 | 5.70166E-05 | 9.9848E-05  | 0.000130828 | 0.0001937   | 5.91807E-05 | 2.9198E-05  | 0.000109777 | 0.000109829 | 1.179759E-07 | 0.000663665   | 3.171935E-09  | 0.000170044   | 0.000170044   |
| UBIQUITIN-LINKING COMPLEX 1                       | Ubiquitin-like domain-containing C20 phosphatase 1                                 | UBCP1      | 0.000044632 | 0.00001574  | 6.80035E-05 | 0.000123045 | 0.000065468 | 0.000157347 | 0.000127255 | 0.000127255 | 0.000065468 | 0.000032633  | 0.000103359   | 0.00008371    | 1.4650551E-07 | 0.000044632   |
| PE1 proteolytic signal-containing nuclear protein | PE1 proteolytic signal-containing nuclear protein                                  | PEP1       | 0.000140622 | 0.000144442 | 0.000251361 | 0.000120893 | 0.000060999 | 0.000124164 | 0.000156182 | 0.000156182 | 0.000156182 | 0.000140622  | 0.000140622   | 0.000140622   | 2.5724403E-07 | 0.000140622   |
| Probable RNA polymerase II subunit 1              | Probable RNA polymerase II subunit 1                                               | TRB1       | 0.000160308 | 0           | 0           | 0.000107772 | 0.000117161 | 0.000117161 | 0.000117161 | 0.000117161 | 0.000117161 | 0.000160308  | 0.000160308   | 0.000160308   | 0.000160308   | 0.000160308   |
| ATXN2L                                            | Ataxin-2-like protein                                                              | ATXN2L     | 6.21725E-05 | 3.65076E-05 | 0           | 6.68395E-05 | 6.63446E-05 | 0           | 0.000130694 | 1.80002E-05 | 0           | 1.28776E-05  | 4.43814E-05   | 3.87474E-05   | 1.1987761E-05 | 0.000130694   |
| USP48                                             | USP48 small nuclear ribonucleoprotein Psp1                                         | PRP31      | 0.001603935 | 0.000091319 | 0.000022086 | 0.000175268 | 0.00124306  | 0.001205219 | 0.001826276 | 0.001804783 | 0.000470204 | 0.00004213   | 0.000140048   | 0.000139491   | 1.4861893E-07 | 0.001603935   |
| AT18C                                             | AT18C interaction protein                                                          | AT18C      | 0           | 0.000402627 | 0.000034654 | 0.000168705 | 0.000257501 | 0.000174417 | 0.000838868 | 0.001550815 | 0.000155249 | 0.000176627  | 0.000154489   | 1.051717029   | 0.000168705   | 1.573570E-05  |
| PAR6A                                             | Par6alpha component 1                                                              | PAR6A      | 0.000414715 | 0.40345E-05 | 0           | 0.000232507 | 0           | 0.000198111 | 0.000198111 | 0.000198111 | 0.000198111 | 0.000198111  | 0.000198111   | 0.000198111   | 0.000198111   | 0.000414715   |
| DNAH9                                             | DNAH9 homolog family C member 9                                                    | DNAH9      | 7.06844E-05 | 0.00021778  | 0.000119902 | 0.000106037 | 0           | 0           | 0           | 0           | 0           | 0.00018118   | 3.53476E-05   | 0.2589499E-04 | 0.000119902   | 0.000119902   |
| ITIH2                                             | ITIH2                                                                              | ITIH2      | 2.29932E-05 | 2.55117E-06 | 1.80209E-06 | 1.30116E-06 | 6.02096E-06 | 0           | 2.29622E-06 | 0           | 0           | 1.67105E-05  | 2.59002E-06   | 8.82416E-07   | 0.1501054E-03 | 0.1996440E-06 |
| TRXN                                              | Histone H1X                                                                        | TRXN       | 0.00155887  | 0.000171583 | 0           | 0.000094234 | 0.000197825 | 0           | 0.000124604 | 6.8139E-05  | 0           | 0.000144559  | 0.000170719   | 9.938E-05     | 1.2468921E-07 | 0.00155887    |
| TCF7L1                                            | Tcf7-like protein 1                                                                | TCF7L1     | 0.00013845  | 0           | 0.00003377  | 6.33816E-05 | 0.000156084 | 0           | 0.000156084 | 0           | 0           | 4.12438E-05  | 0.000156084   | 0.000156084   | 0.00013845    | 0.00013845    |
| CELSR3                                            | Cell surface-specific I-lectin-like transmembrane receptor family class 3 member 3 | CELSR3     | 0           | 0           | 0           | 0           | 0           | 0           | 0           | 0           | 0           | 0            | 0             | 0             | 0             | 0             |
| PCSK9                                             | Protein converting enzyme 1                                                        | PCSK9      | 4.464E-05   | 0           | 0           | 0.20717E-05 | 9.9300E-05  | 5.85709E-05 | 0           | 1.488E-05   | 6.67917E-06 | 4.16313E-05  | 3.3356684E-05 | 0.162428E-05  | 0.0001464E-05 | 4.464E-05     |
| AP3 complex subunit sigma-1                       | AP3 complex subunit sigma-1                                                        | AP3S1      | 6.84937E-05 | 0           | 0           | 0           | 9.53498E-05 | 0.000182049 | 0           | 0           | 0           | 2.31446E-05  | 0             | 0.24386E-05   | 0.000182049   | 0.000182049   |
| Heat shock protein 105 kDa                        | Heat shock protein 105 kDa                                                         | HSP105     | 0.00115277  | 0.000591893 | 0.000169347 | 0.000069428 | 0.000066791 | 0.000336827 | 0.000130087 | 0.000130087 | 0.000116487 | 0.000178817  | 0.000150835   | 0.000191593   | 1.1891381E-07 | 0.00115277    |
| UNC119B                                           | UNC119B                                                                            | UNC119B    | 0.00002559  | 0           | 0.000023967 | 9.70045E-05 | 5.00046E-05 | 0.00015641  | 0.000049526 | 1.63444E-06 | 0.000000000 | 9.42008E-05  | 0.000160161   | 0.6350468E-06 | 0.00002559    | 0.00002559    |
| LRN4                                              | Leu-1-related protein 4B                                                           | LRN4       | 0.00028735  | 2.15181E-05 | 0           | 0.000050515 | 0           | 0.85396E-05 | 0           | 0.85396E-05 | 0           | 0.000132081  | 0.816022E-05  | 2.84813E-05   | 0.00028735    | 0.00028735    |
| PCSK2                                             | Protein converting enzyme 2                                                        | PCSK2      | 0           | 0           | 0           | 7.94161E-05 | 0           | 0           | 0           | 0           | 0           | 1.44032E-06  | 2.47437E-05   | 0.1774789E-07 | 0.000132081   | 0.000132081   |
| NUFIP3                                            | Nucleolar protein complex protein NUFIP3                                           | NUFIP3     | 0.000057399 | 0.000047335 | 0.000048478 | 0.000019718 | 0.000125601 | 0.000167966 | 4.81925E-05 | 4.99474E-05 | 7.64888E-06 | 0.00004317   | 0.000131945   | 4.70023E-05   | 0.000057399   | 0.000057399   |
| MURF1                                             | MURF1                                                                              | MURF1      | 9.8191E-05  | 0           | 0           | 0.000102025 | 0           | 0           | 0           | 0           | 0           | 3.002E-05    | 0.30242E-05   | 1.3311E-05    | 0.000102025   | 0.000102025   |
| ANKRD58                                           | Ankyrin domain containing protein 58                                               | ANKRD58    | 0.000094642 | 0.000087967 | 0.000144487 | 0.000069769 | 0.000179149 | 0.000048814 | 0.000033318 | 0.000033318 | 0.000033318 | 0.000094642  | 0.000094642   | 0.000094642   | 0.000094642   | 0.000094642   |
| APC1                                              | Adenomatous polyposis coli 1                                                       | APC1       | 0.00024255  | 0.000202383 | 1.16705E-05 | 0.000165481 | 1.78426E-06 | 0.000300215 | 0.000178047 | 0.000126452 | 0.000030979 | 0.000178047  | 0.000054844   | 0.000094642   | 0.00024255    | 0.00024255    |
| HMC2                                              | Histone deacetylase 2/histone deacetylase 1                                        | HMC2/HDAC1 | 0.000102689 | 0.000027163 | 5.97007E-06 | 0.000103579 | 0.000022066 | 0.000103579 | 0.000124951 | 0.000046519 | 5.04961E-05 | 0.000124951  | 0.000013076   | 0.000139714   | 1.4500910E-07 | 0.000102689   |
| SYMPK                                             | Sympkin                                                                            | SYMPK      | 1.582E-05   | 0           | 3.17596E-05 | 0           | 0           | 0.000187132 | 0           | 0           | 0           | 5.27334E-06  | 1.25318E-05   | 0.0544E-05    | 2.374673E-07  | 0.000187132   |
| GGH                                               | Guanine glyoxylase                                                                 | GGH        | 0           | 4.40171E-05 | 0           | 0.000103735 | 0           | 0           | 0           | 0           | 0           | 1.47408E-05  | 5.12107E-05   | 0             | 0             | 0.000103735   |
| COX2A2                                            | Cytochrome c oxidase subunit 2A2                                                   | COX2A2     | 0           | 0           | 0           | 1.82036E-05 | 1.37006E-05 | 0           | 0           | 0           | 0           | 0            | 0             | 0             | 0             | 0             |
| RNA52                                             | RNA52                                                                              | RNA52      | 0.0000466   | 0.0000186   | 0.58333E-06 | 1.20093E-05 | 5.28248E-05 | 0.00018407  | 4.00000E-05 | 0           | 0           | 6.67516E-06  | 0.000022775   | 1.35446E-05   | 0.0000466     | 0.0000466     |
| UPP1                                              | Uridylate phosphorylase 1                                                          | UPP1       | 0.000007299 | 1.8033E-05  | 3.25920E-05 | 0.00002486  | 5.911E-05   | 4.63474E-05 | 0.0001841   | 0.00011841  | 7.99274E-05 | 0.00001479   | 0.00011352    | 4.8488E-05    | 0.000007299   | 0.000007299   |
| CPDPO                                             | CPDPO                                                                              | CPDPO      | 0.000039632 | 0.000150909 | 0           | 0.000078913 | 0.000179973 | 0.000129607 | 0.00018202  | 0.00018202  | 0.00018202  | 0.000039632  | 0.000039632   | 0.000039632   | 0.000039632   | 0.000039632   |
| GRW4                                              | GRW4                                                                               | GRW4       | 0           | 0           | 4.19409E-06 | 0           | 0           | 0           | 0           | 0           | 0           | 0            | 0             | 0             | 0             | 0             |
| KHSP8                                             | Heat shock protein 8 kDa                                                           | KHSP8      | 0.00009923  | 0.00007911  | 0.000028132 | 0.00004011  | 0.000107144 | 0.00003136  | 0.00017613  | 0.000132545 | 0.00010903  | 0.00018279   | 0.000176325   | 1.4644323E-06 | 0.00009923    | 0.00009923    |
| TRAF3IP1                                          | TRAF3IP1                                                                           | TRAF3IP1   | 5.17025E-05 | 1.49548E-05 | 0           | 0.00013056  | 0           | 0           | 0.86746E-05 | 0           | 0           | 2.22477E-05  | 4.51397E-05   | 1.22495E-05   | 2.0324047E-07 | 0.00013056    |
| USP7                                              | USP7                                                                               | USP7       | 0           | 0           | 5.48871E-05 | 0           | 0           | 0           | 0           | 0           | 0           | 0            | 0             | 0             | 0             | 0             |
| USP9                                              | USP9                                                                               | USP9       | 8.19590E-06 | 4.8212E-06  | 0.36058E-05 | 0           | 2.9707E-05  | 4.19368E-05 | 0.00003747  | 3.05959E-05 | 4.27394E-06 | 1.99907E-05  | 0.000136543   | 4.6510485E-06 | 8.22642E-06   | 3.194201E-07  |
| USP10                                             | USP10                                                                              | USP10      | 0.000109425 | 0           | 3.20312E-05 | 0.00008713  | 1.61676E-05 | 0.0001818   | 0.000032419 | 0.00017882  | 5.84017E-05 | 6.00349E-05  | 0.000136543   | 2.7184264E-07 | 0.000109425   | 0.000109425   |
| USP9B                                             | USP9B                                                                              | USP9B      | 0.000044632 | 0.00014637  | 8.4827E-05  | 0.00000816  | 0.000102462 | 0.000003263 | 0.000003263 | 0.000003263 | 0.000003263 | 0.000044632  | 0.000044632   | 0.000044632   | 0.000044632   | 0.000044632   |
| USP9C                                             | USP9C                                                                              | USP9C      | 0.000044632 | 0.00014637  | 8.4827E-05  | 0.00000816  | 0.000102462 | 0.000003263 | 0.000003263 | 0.000003263 | 0.000003263 | 0.000044632  | 0.000044632   | 0.000044632   | 0.000044632   | 0.000044632   |
| USP9D                                             | USP9D                                                                              | USP9D      | 0.000044632 | 0.00014637  | 8.4827E-05  | 0.00000816  | 0.000102462 | 0.000003263 | 0.000003263 | 0.000003263 | 0.000003263 | 0.000044632  | 0.000044632   | 0.000044632   | 0.000044632   | 0.000044632   |
| USP9E                                             | USP9E                                                                              | USP9E      | 0.000044632 | 0.00014637  | 8.4827E-05  | 0.00000816  | 0.000102462 | 0.000003263 | 0.000003263 | 0.000003263 | 0.000003263 | 0.000044632  | 0.000044632   | 0.000044632   | 0.000044632   | 0.000044632   |
| USP9F                                             | USP9F                                                                              | USP9F      | 0.000044632 | 0.00014637  | 8.4827E-05  | 0.00000816  | 0.000102462 | 0.000003263 | 0.000003263 | 0.000003263 | 0.000003263 | 0.000044632  | 0.000044632   | 0.000044632   | 0.000044632   | 0.000044632   |
| USP9G                                             | USP9G                                                                              | USP9G      | 0.000044632 | 0.00014637  | 8.4827E-05  | 0.00000816  | 0.000102462 | 0.000003263 | 0.000003263 | 0.000003263 | 0.000003263 | 0.000044632  | 0.000044632   | 0.000044632   | 0.000044632   | 0.000044632   |
| USP9H                                             | USP9H                                                                              | USP9H      | 0.000044632 | 0.00014637  | 8.4827E-05  | 0.00000816  | 0.000102462 | 0.000003263 | 0.000003263 | 0.000003263 | 0.000003263 | 0.000044632  | 0.000044632   | 0.000044632   | 0.000044632   | 0.000044632   |
| USP9I                                             | USP9I                                                                              | USP9I      | 0.000044632 | 0.00014637  | 8.4827E-05  | 0.00000816  | 0.000102462 | 0.000003263 | 0.000003263 | 0.000003263 | 0.000003263 | 0.000044632  | 0.000044632   | 0.000044632   | 0.000044632   | 0.000044632   |
| USP9J                                             | USP9J                                                                              | USP9J      | 0.000044632 | 0.00014637  | 8.4827E-05  | 0.00000816  | 0.000102462 | 0.000003263 | 0.000003263 | 0.000003263 | 0.000003263 | 0.000044632  | 0.000044632   | 0.000044632   | 0.000044632   | 0.000044632   |
| USP9K                                             | USP9K                                                                              | USP9K      | 0.000044632 | 0.00014637  | 8.4827E-05  | 0.00000816  | 0.000102462 | 0.000003263 | 0.000003263 | 0.000003263 | 0.000003263 | 0.000044632  | 0.000044632   | 0.000044632   | 0.000044632   | 0.000044632   |
| USP9L                                             | USP9L                                                                              | USP9L      | 0.000044632 | 0.00014637  | 8.4827E-05  | 0.00000816  | 0.000102462 | 0.000003263 | 0.000003263 | 0.000003263 | 0.000003263 | 0.000044632  | 0.000044632   | 0.000044632   | 0.000044632   | 0.000044632   |
| USP9M                                             | USP9M                                                                              | USP9M      | 0.000044632 | 0.00014637  | 8.4827E-05  | 0.00000816  | 0.000102462 | 0.000003263 | 0.000003263 | 0.000003263 | 0.000003263 | 0.000044632  | 0.000044632   | 0.000044632   | 0.000044632   | 0.000044632   |
| USP9N                                             | USP9N                                                                              | USP9N      | 0.000044632 | 0.00014637  | 8.4827E-05  | 0.00000816  | 0.000102462 | 0.000003263 | 0.000003263 | 0.000003263 | 0.000003263 | 0.000044632  | 0.000044632   | 0.000044632   | 0.000044632</ |               |









|                                                                                                                                    |                                                             |                      |             |             |             |             |             |             |         |             |
|------------------------------------------------------------------------------------------------------------------------------------|-------------------------------------------------------------|----------------------|-------------|-------------|-------------|-------------|-------------|-------------|---------|-------------|
| Q99576,Q5JRJ0,E7EWD5,Q99576-4,Q99576-3,Q5JRJ2,D6R092,D6R091,H0Y865,H7BZ77,Q15714-3,Q99508-2,Q99508,Q15714-3,Q75157-2,Q75157,Q15714 | TSC22 domain family protein 3                               | TSC2D3               | 0           | 0           | 0           | 0.003396272 | 0.001859966 | 0.001543727 | #DIV/0! | 0.01665358  |
| 3QRMS,Q8N138-4,Q8N138,JKT9,F6W514,F8VXD5,Q8P053,Q33FV1                                                                             | ORM1-like protein 3,ORM1-like protein 1,ORM1-like protein 2 | ORMDL3,ORMDL1,ORMDL2 | 0           | 0           | 0           | 0.000671664 | 0.001530214 | 0.000841951 | #DIV/0! | 0.01805544  |
| Q7L5D6,Q7L5D6-2,C9JPA8,C9JHN8,C9IY46                                                                                               | Golgi to ER traffic protein 4 homolog                       | GET4                 | 0           | 0           | 0           | 0.003746692 | 0.001479127 | 0.002169422 | #DIV/0! | 0.021328523 |
| Q3R909,Q9LNF1-2,Q9LNF1,Q5H907,ADA087K070,G5E9N2,Q12816-5,Q12816-2,Q12816-3,Q12816-4,Q12816                                         | Melanoma-associated antigen D2                              | MAGED2               | 0           | 0           | 0           | 0.000652072 | 0.000469927 | 0.000226067 | #DIV/0! | 0.021940047 |
| P51991-2                                                                                                                           | Heterogeneous nuclear ribonucleoprotein A3                  | HNRNPA3              | 0           | 0           | 0           | 0.000182671 | 6.87591E-05 | 0.000210234 | #DIV/0! | 0.023716433 |
| Q00767                                                                                                                             | Acyl-CoA desaturase                                         | SCD                  | 0           | 0           | 0           | 0.000257698 | 8.73424E-05 | 0.000165572 | #DIV/0! | 0.025884047 |
| Q6ZVM7-3,Q6ZVM7,87ZZU2,Q6ZVM7-2,Q6ZVM7-5,F5H356,Q6ZVM7-4,K7ENB0                                                                    | TOM1-like protein 2                                         | TOM1L2               | 0           | 0           | 0           | 0.000277559 | 0.000332095 | 0.000677326 | #DIV/0! | 0.026595249 |
| ADA087WWL9,A2AEA2,P10321,F6UDH7,Q31612,P30499,Q956                                                                                 | HLA class I histocompatibility antigen, Cw-7 alpha chain    | HLA-C                | 0           | 0           | 0           | 0.001834072 | 0.000531729 | 0.001059821 | #DIV/0! | 0.039188405 |
| 04FW928,Q09160                                                                                                                     | mRNA cap guanine-N7 methyltransferase                       | RNMT                 | 0           | 0           | 0           | 0.000179189 | 7.39906E-05 | 0.000287044 | #DIV/0! | 0.042907374 |
| K7EP06,Q43148,Q43148-2,K7ERH6                                                                                                      | Protein yyppee-like 5                                       | YPEL5                | 0           | 0           | 0           | 5.64568E-05 | 9.66227E-05 | 0.000190842 | #DIV/0! | 0.045079463 |
| 626599                                                                                                                             |                                                             |                      |             |             |             |             |             |             |         |             |
| <b>Decreased DAPs (Fold change = 0)</b>                                                                                            |                                                             |                      |             |             |             |             |             |             |         |             |
| ADA087WVM7,V9GYPS,ADA087WWQ2,Q92979                                                                                                | Ribosomal RNA small subunit methyltransferase NEP1          | EMG1                 | 7.77146E-05 | 6.25182E-05 | 9.72227E-05 | 0           | 0           | 0           | 0       | 0.001401875 |
| QBYS1                                                                                                                              | Peptidase M20 domain-containing protein 2                   | PM20D2               | 5.63666E-05 | 7.25825E-05 | 2.76166E-05 | 0           | 0           | 0           | 0       | 0.016546213 |
| P35658-2,P35658-4,P35658,P35658-3,P35658-5,H0YF36,H0Y837,H0YD54,EPKXZ2,B7ZAV2                                                      | Nuclear pore complex protein Nup214                         | NUP214               | 0.000175602 | 5.56479E-05 | 0.000256509 | 0           | 0           | 0           | 0       | 0.049488264 |

Table S4. DAPs (MG132 12 h / DMSO)

| Protein IDs                                                        | Protein names                                                                    | Gene names               | DMSO #1     | DMSO #2     | DMSO #3     | MG132 12 h #1 | MG132 12 h #2 | MG132 12 h #3 | Fold-change | p-value     |
|--------------------------------------------------------------------|----------------------------------------------------------------------------------|--------------------------|-------------|-------------|-------------|---------------|---------------|---------------|-------------|-------------|
| Q504T8;K7END3;K7EN9                                                | Midolin                                                                          | MDIN                     | 0           | 0           | 2.6197E-06  | 0.001307119   | 0.00080678    | 0.00041946    | 999.981413  | 0.02591987  |
| Q5VYK3;J3K1N16;R4GM1;F6XAC5                                        | Proteasome-associated protein ECM29 homolog                                      | ECM29;AAO368             | 4.42319E-05 | 1.31092E-05 | 0           | 0.00598357    | 0.007158973   | 0.004043109   | 299.7089309 | 0.002375018 |
| Q9NR09                                                             | Baculoviral IAP repeat-containing protein 6                                      | BIRC6                    | 2.71608E-06 | 0           | 0           | 0.00023504    | 0.000325905   | 0.000119613   | 250.5677305 | 0.019355629 |
| Q95071-2                                                           | E3 ubiquitin-protein ligase UBR5                                                 | UBR5                     | 2.32211E-06 | 0           | 0           | 0.000161362   | 0.0002129E-05 | 6.10429E-05   | 188.6336578 | 0.032679184 |
| 2:Q95071;E7EMW7;E7ETB4;E5RFK7                                      | Ubiquitin-like protein 4A                                                        | UBL4A                    | 0.000109133 | 0           | 0           | 0.003744665   | 0.005317357   | 0.003303148   | 113.3039492 | 0.002622913 |
| P11441;Q5HYH1;F9W870                                               |                                                                                  |                          |             |             |             |               |               |               |             |             |
| P46379-2;P46379;P46379-3;P46379-5;P46379-6                         |                                                                                  |                          |             |             |             |               |               |               |             |             |
| 4:X6REW1;F656P2;F6UR09;F6U1F2;F6X7                                 | Large proline-rich protein BAG6                                                  | BAG6                     | 0           | 0.000105502 | 0           | 0.004715918   | 0.003614143   | 0.002353736   | 101.2850735 | 0.006671895 |
| U0;H0Y71;F6R6G75;F6WML8;F6VEM6;F6X9W3;F6U341;H0Y4L1;F6T;C96;H0Y7K4 |                                                                                  |                          |             |             |             |               |               |               |             |             |
| K7EKW3;H0Y759;H0Y583;E7ESS3;O9S1                                   |                                                                                  |                          |             |             |             |               |               |               |             |             |
| 64;Q17RG4-2;Q17RG4                                                 |                                                                                  |                          |             |             |             |               |               |               |             |             |
| Q9P0P0;C911C6;F9WBU5;C9J391;H7C4                                   | E3 ubiquitin-protein ligase RNF181                                               | RNF181                   | 0.000551718 | 0.001387169 | 0           | 0.034181961   | 0.03836681    | 0.040000681   | 57.89574107 | 3.21157E-05 |
| 26                                                                 |                                                                                  |                          |             |             |             |               |               |               |             |             |
| Q5T457-3;Q5T457-4;Q5T457;Q5T457-2;Q5T457-5;X6RE05;X6R960           | E3 ubiquitin-protein ligase UBR4                                                 | UBR4                     | 5.90453E-06 | 0           | 0           | 0.000117508   | 0.000126661   | 7.88999E-05   | 54.70522566 | 0.002026093 |
| Q5TDH0;Q5TDH0-3;Q5TDH0-2                                           | Protein DD11 homolog 2                                                           | DD12                     | 2.0655E-06  | 0           | 0           | 0.00017058    | 0.00032434    | 0.000472766   | 47.3341328  | 0.002197353 |
| 2:HOY14;H0Y90;Q8WU10                                               |                                                                                  |                          |             |             |             |               |               |               |             |             |
| B7AJY7;O758B2;B7A1Y5;O758B2-2;B7A1                                 | 26S proteasome non-ATPase regulatory subunit 10                                  | PSMD10                   | 0.000119373 | 0.000343228 | 0           | 0.00449333    | 0.004314899   | 0.00204458    | 24.3377729  | 0.004874027 |
| Q9LHD9                                                             | Ubiquitin-2                                                                      | UBLQ2                    | 0.000134753 | 0           | 0           | 0.000649798   | 0.000562198   | 0.001109737   | 17.22947919 | 0.014256502 |
| Q13501;E7EMC7;Q13501-2;E9PW8;E3W990;C9JR8;D6R8F1;C9J6              | Sequestosome-1                                                                   | SQSTM1                   | 0.000168414 | 0.000102116 | 0.000128113 | 0.003080351   | 0.00172569    | 0.001735708   | 16.55955077 | 0.010413812 |
| J8                                                                 |                                                                                  |                          |             |             |             |               |               |               |             |             |
| Q8TAT6;Q8TAT6-2;J3L49                                              | Nuclear protein localization protein 4 homolog                                   | NPLOC4                   | 1.63884E-05 | 0           | 0           | 0.000121403   | 9.69641E-05   | 4.22108E-05   | 15.90011672 | 0.027639663 |
| Q8WVY7                                                             | Ubiquitin-like domain-containing CTD phosphatase 1                               | UBLCP1                   | 0.000944527 | 0.00087154  | 6.86303E-05 | 0.010322725   | 0.009722655   | 0.006065749   | 14.14079798 | 0.002237041 |
| Q15294;Q15294-3;O15294-2;O15294-4;C9JZL3;H7C17                     | UDP-N-acetylglucosamine--peptide N-acetylglucosaminyltransferase 110 kDa subunit | OGT                      | 3.29908E-05 | 1.00179E-05 | 1.91412E-05 | 0.000248711   | 0.000224067   | 0.000290949   | 12.28847725 | 0.000345839 |
| Q9GZL8;H3BU14;H3BM09;H3BP64;H3B8                                   |                                                                                  |                          |             |             |             |               |               |               |             |             |
| T8;H3BSV6;H3BT12;H3BQQ6;Q6P4H7;H3BSF0;H3BU93;H3BN22;H3BNK9;H3B8    | Protein FAM192A                                                                  | FAM192A;NIP30            | 0.00850783  | 0.007910531 | 0.005092945 | 0.064974116   | 0.116111521   | 0.079868141   | 12.13100582 | 0.00632485  |
| PH9;H3BP9                                                          |                                                                                  |                          |             |             |             |               |               |               |             |             |
| Q7Z6Z7-2;Q7Z6Z7                                                    |                                                                                  |                          |             |             |             |               |               |               |             |             |
| 3:Q7Z6Z7;Q7Z6Z7;AD087146;Q5H96                                     | E3 ubiquitin-protein ligase HUWE1                                                | HUWE1                    | 2.7482E-05  | 1.96869E-05 | 1.36745E-05 | 0.000305139   | 0.000231806   | 0.00194483    | 12.02070183 | 0.002408927 |
| 3:AD087X153                                                        |                                                                                  |                          |             |             |             |               |               |               |             |             |
| Q06323;Q06323-3;Q06323-2;H0YKK6;H0YU12                             | Proteasome activator complex subunit 1                                           | PSME1                    | 0.025208147 | 0.028094984 | 0.023623931 | 0.309624972   | 0.345869905   | 0.211713255   | 11.27078175 | 0.002767243 |
| 2:H0YKK6;H0YU12                                                    |                                                                                  |                          |             |             |             |               |               |               |             |             |
| AD087X12;Q9JUL4;H0YM70;H0YGL1;H0YLD2;H0YKU2                        | Proteasome activator complex subunit 2                                           | PSME2                    | 0.026252794 | 0.03063095  | 0.024590289 | 0.303265537   | 0.311526922   | 0.302804341   | 11.22127261 | 1.24829E-07 |
| Q981Y7;E9PIX0                                                      | Protein HGH1 homolog                                                             | HGH1                     | 4.05135E-05 | 0           | 0           | 0.000183833   | 9.49139E-05   | 0.000161376   | 10.86361679 | 0.01126131  |
| P54578                                                             |                                                                                  |                          |             |             |             |               |               |               |             |             |
| 2:P54578;A6N1A2;B7Z4N8;J3QQ7E;J3K5                                 | Ubiquitin carboxyl-terminal hydrolase 14;Ubiquitin carboxyl-terminal hydrolase   | USP14                    | 0.001341434 | 0.000355867 | 0.000798707 | 0.009509058   | 0.006948791   | 0.0096251     | 10.44986497 | 0.001023673 |
| 55;H0Y4A7                                                          |                                                                                  |                          |             |             |             |               |               |               |             |             |
| Q9H7D7-                                                            |                                                                                  |                          |             |             |             |               |               |               |             |             |
| 2:Q9H7D7;H0Y9R3;C9JCS7;H0Y917;Q9                                   | WD repeat-containing protein 26                                                  | WDR26                    | 3.28769E-05 | 0           | 0           | 6.36483E-05   | 9.42701E-05   | 0.0001712     | 10.01062547 | 0.043243042 |
| H7D7-3;Q9H7D7-4                                                    |                                                                                  |                          |             |             |             |               |               |               |             |             |
| AD087X153                                                          |                                                                                  |                          |             |             |             |               |               |               |             |             |
| 5:Q8TCT9;Q8TCT9-4;Q8TCT9-2                                         | Minor histocompatibility antigen H13                                             | HM13                     | 4.26143E-05 | 0           | 0           | 0.000115051   | 0.000144898   | 0.000129587   | 9.98573945  | 0.001206636 |
| P54725-2;P54725-3;P54725;K7EN0;K7ELW1;K7EQ16                       | UV excision repair protein RAD23 homolog A                                       | RAD23A                   | 0.000753452 | 0.000423776 | 0           | 0.005142909   | 0.003570177   | 0.002993219   | 9.943961055 | 0.006635184 |
| Q13617;Q13617-2;Q13617-3;Q13617-4                                  | Cullin-2                                                                         | CUL2                     | 0           | 1.32032E-05 | 0           | 6.11925E-05   | 4.10539E-05   | 2.47963E-05   | 9.622092364 | 0.029218529 |
| Q9H9L7;B4DQ;P0H0YEQ5;Q9H9L7-2                                      | Akirin-1                                                                         | AKIRIN1                  | 0.001066905 | 0.000577518 | 0           | 0.005223821   | 0.006077332   | 0.002561854   | 8.43031709  | 0.020949677 |
| Q86YQD;Q96MX6                                                      |                                                                                  |                          |             |             |             |               |               |               |             |             |
| 2:Q96MX6;Q8ND98;H7C389;F6U119;D13                                  | WD repeat-containing protein 92                                                  | HZGU;WDR92;K2FZ;K4348156 | 7.59424E-05 | 1.11023E-05 | 8.06744E-06 | 0.000260126   | 0.000151569   | 0.000372679   | 8.246839581 | 0.027261199 |
| Q43396;K7ER66;K7EM9;K7EP87;K7EKG                                   | Thioredoxin-like protein 1                                                       | TXN1L                    | 0.023496098 | 0.016486823 | 0.014997885 | 0.14023405    | 0.182225753   | 0.119387174   | 8.036389342 | 0.002301785 |
| 2;K7EM7                                                            |                                                                                  |                          |             |             |             |               |               |               |             |             |
| F5GWN1;J3KRPE;J3Q572;K6R312;J3QQ                                   | Protein SSKT                                                                     | SS18                     | 0.000382923 | 0.000175425 | 0           | 0.000822752   | 0.0002026305  | 0.001244257   | 7.653489934 | 0.043256142 |
| M2J3K7;J3Q5QW2;Q15532-2;Q15532-1                                   |                                                                                  |                          |             |             |             |               |               |               |             |             |
| Q6KCM8;Q95579-3;Q95579-2                                           | Tumor necrosis factor alpha-induced protein 8                                    | TNFAIP8                  | 0           | 0           | 0.000162659 | 0.000477753   | 0.000178848   | 0.000515363   | 7.222808418 | 0.04789648  |
| Q95379;Q95379-4                                                    |                                                                                  |                          |             |             |             |               |               |               |             |             |
| P54727;Q5W055;P54727-2                                             | UV excision repair protein RAD23 homolog B                                       | RAD23B                   | 0.013665458 | 0.005421185 | 0.004634043 | 0.052797502   | 0.043828662   | 0.054891849   | 6.387688569 | 0.000668588 |
| 2:Q5W055;H0Y579                                                    |                                                                                  |                          |             |             |             |               |               |               |             |             |
| Q98XR0-2;Q98XR0;K7EP6;K7EJ21                                       | Queuine tRNA-ribosyltransferase                                                  | QTRT1                    | 0           | 0           | 5.64023E-05 | 0.000105274   | 9.88551E-05   | 0.000137844   | 6.063095271 | 0.013046327 |
| P52657;H0YK39;A8MYR4;REV_Q6LUB99                                   | Transcription initiation factor IIA subunit 2                                    | GTF2A2                   | 0.0001126   | 0           | 0.000789633 | 0.001898924   | 0.001932597   | 0.001548378   | 5.963871281 | 0.005626109 |
| P46821;D6RA32;D6RA40;D6RC12;D6RG                                   | Microtubule-associated protein 18;MAP1B heavy chain;MAP1 light chain L1          | MAP1B                    | 2.86172E-05 | 5.59474E-06 | 1.32401E-05 | 0.000146261   | 6.16487E-05   | 7.39825E-05   | 5.93672685  | 0.045813669 |
| Q35H80                                                             | Akirin-2                                                                         | AKIRIN2                  | 0.012132132 | 0.017596427 | 0.018242226 | 0.050341738   | 0.04662083    | 0.016198308   | 5.915350675 | 0.038812213 |
| P51571;A6NLM8                                                      | Transacon-associated protein subunit delta                                       | SSRA                     | 0.000319812 | 0.000096042 | 6.77865E-05 | 0.002602889   | 0.003277672   | 0.00181957    | 5.712335975 | 0.013146955 |
| P15104;AD087WJ1                                                    | Glutamine synthetase                                                             | GLUL                     | 0.000256008 | 0.000120041 | 0           | 0.000738291   | 0.000818367   | 0.000325509   | 5.034177518 |             |
| Q15370;88ZU8;Q15370-2;J3L0M9                                       | Transcription elongation factor B polypeptide 2                                  | TCEB2                    | 0.006020543 | 0.001866655 | 0.00489331  | 0.026495562   | 0.020065761   | 0.002179371   | 4.995560250 | 0.001607258 |
| C9JY29;P30876;C9J4M6                                               | DNA-directed RNA polymerase;DNA-directed RNA polymerase II subunit RP2B          | POLR2B                   | 0.000103062 | 5.80022E-05 | 6.47012E-05 | 0.000130687   | 0.00044847    | 0.00021668    | 4.867690905 | 0.017473961 |
| Q05086-3;Q05086;Q05086-2;S4R306                                    | Ubiquitin-protein ligase E3A                                                     | UBE3A                    | 0.001593022 | 0.001644789 | 0.001400348 | 0.007506784   | 0.007054642   | 0.007206878   | 4.585529931 | 0.000815833 |
| Q43765;K7EMD6                                                      | Small glutamine-rich tetrapeptide repeat-containing protein alpha                | SGTA                     | 0.00060897  | 0.000484976 | 0           | 0.002035314   | 0.001584418   | 0.00103544    | 4.25585291  | 0.02597105  |
| Q52525;ZAS;Q5JUP7                                                  | Transitional endoplasmic reticulum ATPase                                        | VCP                      | 0.00240812  | 0.001666652 | 0.000233873 | 0.011279763   | 0.00763289    | 0.007198973   | 4.246751138 | 0.019110354 |
| Q9NSE4                                                             | isoleucine--tRNA ligase, mitochondrial                                           | IARS2                    | 2.35408E-05 | 1.82328E-05 | 0           | 6.66065E-05   | 4.87434E-05   | 6.15416E-05   | 4.234904401 | 0.007173903 |
| Q95163;F5H210                                                      | Elongator complex protein 1                                                      | IKKAP                    | 3.63375E-05 | 1.04038E-05 | 0           | 9.38102E-05   | 5.1406E-05    | 5.15588E-05   | 4.209600921 | 0.048115753 |
| Q5JV3-3;Q5JV3-2;Q5JV3;Q5JV3-4                                      | PCI domain-containing protein 2                                                  | PCD2                     | 8.3682E-05  | 1.41319E-05 | 0.0001109   | 0.000334006   | 0.00035953    | 0.000170322   | 4.186863742 | 0.029874651 |
| F8VUX1;F8VY3;F8W016;F5H4R6;P5520                                   |                                                                                  |                          |             |             |             |               |               |               |             |             |
| 9-                                                                 |                                                                                  |                          |             |             |             |               |               |               |             |             |
| 2:P5209;F8V959;B7Z9C2;H0YIV4;83KV                                  | Nucleosome assembly protein 1-like 1                                             | NAP1L1                   | 0.00647786  | 0.000879342 | 0           | 0.012739026   | 0.007896068   | 0.009730652   | 4.127349719 | 0.03610953  |
| 44;F8W020;F8V816;H0YHC3;F8W118;B7                                  |                                                                                  |                          |             |             |             |               |               |               |             |             |
| VR12;F8V85;H0YH88;B7Z4K9                                           |                                                                                  |                          |             |             |             |               |               |               |             |             |
| P61289;P61289-2;P61289-3;K9J957;K7E5G5;AD087WTV2;K7ENH             | Proteasome activator complex subunit 3                                           | PSME3                    | 0.137137905 | 0.151226547 | 0.098674635 | 0.419495561   | 0.552215565   | 0.589557436   | 4.03387826  | 0.001914971 |
| 2;B728D3;K7EJF8                                                    |                                                                                  |                          |             |             |             |               |               |               |             |             |
| B5MD17;J3K505;P83916;K7EL4A;C9JWS                                  | Chromobox protein homolog 1                                                      | CBX1                     | 0.000227722 | 0           | 0.000435851 | 0.001020718   | 0.000524042   | 0.001112743   | 4.004837619 | 0.040167109 |
| Q9JUL1;P52434;P52434-4;P52434-3;P52434-2;P52434-5                  | DNA-directed RNA polymerases I, II, and III subunit RPABC3                       | POLR2H                   | 0.001959362 | 0.001091095 | 0.001180136 | 0.00458731    | 0.005251185   | 0.006730431   | 3.916454858 | 0.003995427 |
| Q9Y4E8-2;Q9Y4E8-3;Q9Y4E8;Q9Y4E8-4;F8W0H4;H0Y31;F8VZG8;F8VY7;H0Y    | Ubiquitin carboxyl-terminal hydrolase 15                                         | USP15                    | 0.000145973 | 1.81834E-05 | 2.31162E-05 | 0.00028193    | 0.000180155   | 0.000626361   | 3.868405223 | 0.02645132  |
| HML4;H0Y126;H7C189;Q13107-2;Q9HY6;Q9HY6-3;Q9HY6-6                  |                                                                                  |                          |             |             |             |               |               |               |             |             |
| 2:Q9HY6-4;Q9HY6-5                                                  |                                                                                  |                          |             |             |             |               |               |               |             |             |
| 5:41;Q9JG22;C9J583;F8W054;F8W                                      | DNA-directed RNA polymerase I subunit RPA2                                       | POLR1B                   | 0.000442899 | 0.000124741 | 0.000129857 | 0.001071451   | 0.000752685   | 0.0           |             |             |



|                                                                                                                                                                                                                                                                   |                                                                             |             |             |             |             |             |             |             |             |             |
|-------------------------------------------------------------------------------------------------------------------------------------------------------------------------------------------------------------------------------------------------------------------|-----------------------------------------------------------------------------|-------------|-------------|-------------|-------------|-------------|-------------|-------------|-------------|-------------|
| H0Y7A7:P62158:E7ETZ0:E7EMB3:Q96H<br>Y3:G3V361:MQQZ52:F8WBRS:G3V226G<br>3V479Y27462:C37719:P02585<br>Q1571:Q15717                                                                                                                                                  | Calmodulin                                                                  | CALM2;CALM1 | 0.028995277 | 0.008539006 | 0.017065185 | 0.037676811 | 0.048606544 | 0.038094586 | 2.278006472 | 0.028358378 |
| 2:MQQZ95:MDR055:81AM48:81APV9:8<br>1:APY8:81AM49:Q12926-<br>2:Q12926:P26378-4:P26378-2:P26378-<br>5:P26378:P26378-3                                                                                                                                               | ELAV-like protein 1                                                         | ELAVL1      | 0.002483437 | 0.002528279 | 0.002248316 | 0.00455097  | 0.004444328 | 0.006046559 | 2.017872014 | 0.007783566 |
| P31946-2:P31946:Q4VY20:Q4V19<br>P83876:K75L1:K7EP6A:K7EJUZ:K7EMX<br>5:K75L1:K75E07                                                                                                                                                                                | 14-3-3 protein beta/alpha:14-3-3 protein beta/alpha, N-terminally processed | YWHA8       | 0.004656257 | 0.006883846 | 0.001699    | 0.007598389 | 0.006075089 | 0.006653039 | 2.012078277 | 0.025913768 |
| P08107:P08107-2:V9GZ37                                                                                                                                                                                                                                            | Thioredoxin-like protein 4A                                                 | TXN14A      | 0.002203233 | 0.001266805 | 0.003592968 | 0.00543897  | 0.004458236 | 0.00410972  | 1.982678982 | 0.014879982 |
| A0A087X211:P62333:H0VJCD:H0VJ58:H0<br>Y1T1:H0VJX2:H0VJ9:H0VJ1D2:H0VJY8<br>Q13200:Q13200-                                                                                                                                                                          | Heat shock 70 kDa protein 1A                                                | HSPA1A      | 0.467129414 | 0.370017624 | 0.534019157 | 0.81261502  | 0.830902955 | 1.040666741 | 1.957593222 | 0.007415828 |
| 2:Q12926:P26378-4:P26378-2:P26378-<br>5:P26378:P26378-3                                                                                                                                                                                                           | 26S protease regulatory subunit 10B                                         | PSMC6       | 0.194707428 | 0.203247641 | 0.185465417 | 0.34528323  | 0.37695924  | 0.365847392 | 1.865018266 | 9.2297E-05  |
| 2:Q12926:P26378-4:P26378-2:P26378-<br>5:P26378:P26378-3                                                                                                                                                                                                           | 26S proteasome non-ATPase regulatory subunit 2                              | PSMD2       | 0.137767304 | 0.120892889 | 0.10190133  | 0.213486787 | 0.22290505  | 0.22713965  | 1.840272591 | 0.000814307 |
| 1:Z15:P11215-2<br>Q43242:H0VJG8:F5H8K4<br>Q9UNM6:13KNQ3:Q9UNM6-<br>2:A0A087WUL9:E9P138:H0YD73:E9PQG<br>3:E9PPD2:F8WB8<br>P10599:P10599-2<br>P43686:P43686-2<br>P17066:P48741<br>P02785:P02787<br>P40227:P40227-2:J3KR16<br>P62195:J3QJMT:J3QSE0:J3QRW1:J3KT<br>Q9 | 26S proteasome non-ATPase regulatory subunit 3                              | PSMD3       | 0.192703235 | 0.176548271 | 0.125440409 | 0.327936737 | 0.313927079 | 0.256438185 | 1.815881706 | 0.010731784 |
| 2:Q12926:P26378-4:P26378-2:P26378-<br>5:P26378:P26378-3                                                                                                                                                                                                           | 26S proteasome non-ATPase regulatory subunit 13                             | PSMD13      | 0.234423954 | 0.163924845 | 0.187492413 | 0.338157256 | 0.365653827 | 0.357922406 | 1.812322298 | 0.002056608 |
| 1:Z15:P11215-2<br>Q43242:H0VJG8:F5H8K4<br>Q9UNM6:13KNQ3:Q9UNM6-<br>2:A0A087WUL9:E9P138:H0YD73:E9PQG<br>3:E9PPD2:F8WB8<br>P10599:P10599-2<br>P43686:P43686-2<br>P17066:P48741<br>P02785:P02787<br>P40227:P40227-2:J3KR16<br>P62195:J3QJMT:J3QSE0:J3QRW1:J3KT<br>Q9 | Thioredoxin                                                                 | TXN         | 0.010303226 | 0.007898252 | 0.010909952 | 0.018689351 | 0.015719683 | 0.017505678 | 1.789493409 | 0.004089853 |
| 1:Z15:P11215-2<br>Q43242:H0VJG8:F5H8K4<br>Q9UNM6:13KNQ3:Q9UNM6-<br>2:A0A087WUL9:E9P138:H0YD73:E9PQG<br>3:E9PPD2:F8WB8<br>P10599:P10599-2<br>P43686:P43686-2<br>P17066:P48741<br>P02785:P02787<br>P40227:P40227-2:J3KR16<br>P62195:J3QJMT:J3QSE0:J3QRW1:J3KT<br>Q9 | 26S protease regulatory subunit 6B                                          | PSMC4       | 0.239815726 | 0.215152296 | 0.185328712 | 0.374695615 | 0.407262912 | 0.285617161 | 1.769471293 | 0.043301389 |
| 1:Z15:P11215-2<br>Q43242:H0VJG8:F5H8K4<br>Q9UNM6:13KNQ3:Q9UNM6-<br>2:A0A087WUL9:E9P138:H0YD73:E9PQG<br>3:E9PPD2:F8WB8<br>P10599:P10599-2<br>P43686:P43686-2<br>P17066:P48741<br>P02785:P02787<br>P40227:P40227-2:J3KR16<br>P62195:J3QJMT:J3QSE0:J3QRW1:J3KT<br>Q9 | Heat shock 70 kDa protein 6                                                 | HSPA6       | 0.02354706  | 0.031447754 | 0.047719256 | 0.055812556 | 0.067389213 | 0.070173697 | 1.748768923 | 0.016511504 |
| 1:Z15:P11215-2<br>Q43242:H0VJG8:F5H8K4<br>Q9UNM6:13KNQ3:Q9UNM6-<br>2:A0A087WUL9:E9P138:H0YD73:E9PQG<br>3:E9PPD2:F8WB8<br>P10599:P10599-2<br>P43686:P43686-2<br>P17066:P48741<br>P02785:P02787<br>P40227:P40227-2:J3KR16<br>P62195:J3QJMT:J3QSE0:J3QRW1:J3KT<br>Q9 | T-complex protein 1 subunit delta                                           | CTC4        | 0.005575232 | 0.004673363 | 0.003238244 | 0.00849115  | 0.007180554 | 0.007294403 | 1.734917661 | 0.014895445 |
| 1:Z15:P11215-2<br>Q43242:H0VJG8:F5H8K4<br>Q9UNM6:13KNQ3:Q9UNM6-<br>2:A0A087WUL9:E9P138:H0YD73:E9PQG<br>3:E9PPD2:F8WB8<br>P10599:P10599-2<br>P43686:P43686-2<br>P17066:P48741<br>P02785:P02787<br>P40227:P40227-2:J3KR16<br>P62195:J3QJMT:J3QSE0:J3QRW1:J3KT<br>Q9 | T-complex protein 1 subunit zeta                                            | CTC6A       | 0.010979883 | 0.00777022  | 0.005994958 | 0.015238795 | 0.013504136 | 0.01416762  | 1.724105636 | 0.017214999 |
| 1:Z15:P11215-2<br>Q43242:H0VJG8:F5H8K4<br>Q9UNM6:13KNQ3:Q9UNM6-<br>2:A0A087WUL9:E9P138:H0YD73:E9PQG<br>3:E9PPD2:F8WB8<br>P10599:P10599-2<br>P43686:P43686-2<br>P17066:P48741<br>P02785:P02787<br>P40227:P40227-2:J3KR16<br>P62195:J3QJMT:J3QSE0:J3QRW1:J3KT<br>Q9 | 26S protease regulatory subunit 8                                           | PSMC5       | 0.25575475  | 0.227850594 | 0.251653906 | 0.419041315 | 0.459439402 | 0.384446856 | 1.690446162 | 0.004264249 |
| 1:Z15:P11215-2<br>Q43242:H0VJG8:F5H8K4<br>Q9UNM6:13KNQ3:Q9UNM6-<br>2:A0A087WUL9:E9P138:H0YD73:E9PQG<br>3:E9PPD2:F8WB8<br>P10599:P10599-2<br>P43686:P43686-2<br>P17066:P48741<br>P02785:P02787<br>P40227:P40227-2:J3KR16<br>P62195:J3QJMT:J3QSE0:J3QRW1:J3KT<br>Q9 | 26S proteasome non-ATPase regulatory subunit 11                             | PSMD11      | 0.176558215 | 0.169195837 | 0.192050797 | 0.324160822 | 0.306906059 | 0.273815082 | 1.68317239  | 0.001658485 |
| 1:Z15:P11215-2<br>Q43242:H0VJG8:F5H8K4<br>Q9UNM6:13KNQ3:Q9UNM6-<br>2:A0A087WUL9:E9P138:H0YD73:E9PQG<br>3:E9PPD2:F8WB8<br>P10599:P10599-2<br>P43686:P43686-2<br>P17066:P48741<br>P02785:P02787<br>P40227:P40227-2:J3KR16<br>P62195:J3QJMT:J3QSE0:J3QRW1:J3KT<br>Q9 | 26S proteasome non-ATPase regulatory subunit 12                             | PSMD12      | 0.153654773 | 0.138221274 | 0.172209806 | 0.230342128 | 0.232389035 | 0.290505374 | 1.623054295 | 0.011927968 |
| 1:Z15:P11215-2<br>Q43242:H0VJG8:F5H8K4<br>Q9UNM6:13KNQ3:Q9UNM6-<br>2:A0A087WUL9:E9P138:H0YD73:E9PQG<br>3:E9PPD2:F8WB8<br>P10599:P10599-2<br>P43686:P43686-2<br>P17066:P48741<br>P02785:P02787<br>P40227:P40227-2:J3KR16<br>P62195:J3QJMT:J3QSE0:J3QRW1:J3KT<br>Q9 | Thioredoxin                                                                 | TXN         | 0.010303226 | 0.007898252 | 0.010909952 | 0.018689351 | 0.015719683 | 0.017505678 | 1.789493409 | 0.004089853 |
| 1:Z15:P11215-2<br>Q43242:H0VJG8:F5H8K4<br>Q9UNM6:13KNQ3:Q9UNM6-<br>2:A0A087WUL9:E9P138:H0YD73:E9PQG<br>3:E9PPD2:F8WB8<br>P10599:P10599-2<br>P43686:P43686-2<br>P17066:P48741<br>P02785:P02787<br>P40227:P40227-2:J3KR16<br>P62195:J3QJMT:J3QSE0:J3QRW1:J3KT<br>Q9 | 26S protease regulatory subunit 6B                                          | PSMC4       | 0.239815726 | 0.215152296 | 0.185328712 | 0.374695615 | 0.407262912 | 0.285617161 | 1.769471293 | 0.043301389 |
| 1:Z15:P11215-2<br>Q43242:H0VJG8:F5H8K4<br>Q9UNM6:13KNQ3:Q9UNM6-<br>2:A0A087WUL9:E9P138:H0YD73:E9PQG<br>3:E9PPD2:F8WB8<br>P10599:P10599-2<br>P43686:P43686-2<br>P17066:P48741<br>P02785:P02787<br>P40227:P40227-2:J3KR16<br>P62195:J3QJMT:J3QSE0:J3QRW1:J3KT<br>Q9 | Heat shock 70 kDa protein 6                                                 | HSPA6       | 0.02354706  | 0.031447754 | 0.047719256 | 0.055812556 | 0.067389213 | 0.070173697 | 1.748768923 | 0.016511504 |
| 1:Z15:P11215-2<br>Q43242:H0VJG8:F5H8K4<br>Q9UNM6:13KNQ3:Q9UNM6-<br>2:A0A087WUL9:E9P138:H0YD73:E9PQG<br>3:E9PPD2:F8WB8<br>P10599:P10599-2<br>P43686:P43686-2<br>P17066:P48741<br>P02785:P02787<br>P40227:P40227-2:J3KR16<br>P62195:J3QJMT:J3QSE0:J3QRW1:J3KT<br>Q9 | T-complex protein 1 subunit delta                                           | CTC4        | 0.005575232 | 0.004673363 | 0.003238244 | 0.00849115  | 0.007180554 | 0.007294403 | 1.734917661 | 0.014895445 |
| 1:Z15:P11215-2<br>Q43242:H0VJG8:F5H8K4<br>Q9UNM6:13KNQ3:Q9UNM6-<br>2:A0A087WUL9:E9P138:H0YD73:E9PQG<br>3:E9PPD2:F8WB8<br>P10599:P10599-2<br>P43686:P43686-2<br>P17066:P48741<br>P02785:P02787<br>P40227:P40227-2:J3KR16<br>P62195:J3QJMT:J3QSE0:J3QRW1:J3KT<br>Q9 | T-complex protein 1 subunit zeta                                            | CTC6A       | 0.010979883 | 0.00777022  | 0.005994958 | 0.015238795 | 0.013504136 | 0.01416762  | 1.724105636 | 0.017214999 |
| 1:Z15:P11215-2<br>Q43242:H0VJG8:F5H8K4<br>Q9UNM6:13KNQ3:Q9UNM6-<br>2:A0A087WUL9:E9P138:H0YD73:E9PQG<br>3:E9PPD2:F8WB8<br>P10599:P10599-2<br>P43686:P43686-2<br>P17066:P48741<br>P02785:P02787<br>P40227:P40227-2:J3KR16<br>P62195:J3QJMT:J3QSE0:J3QRW1:J3KT<br>Q9 | 26S protease regulatory subunit 8                                           | PSMC5       | 0.25575475  | 0.227850594 | 0.251653906 | 0.419041315 | 0.459439402 | 0.384446856 | 1.690446162 | 0.004264249 |
| 1:Z15:P11215-2<br>Q43242:H0VJG8:F5H8K4<br>Q9UNM6:13KNQ3:Q9UNM6-<br>2:A0A087WUL9:E9P138:H0YD73:E9PQG<br>3:E9PPD2:F8WB8<br>P10599:P10599-2<br>P43686:P43686-2<br>P17066:P48741<br>P02785:P02787<br>P40227:P40227-2:J3KR16<br>P62195:J3QJMT:J3QSE0:J3QRW1:J3KT<br>Q9 | 26S proteasome non-ATPase regulatory subunit 11                             | PSMD11      | 0.176558215 | 0.169195837 | 0.192050797 | 0.324160822 | 0.306906059 | 0.273815082 | 1.68317239  | 0.001658485 |
| 1:Z15:P11215-2<br>Q43242:H0VJG8:F5H8K4<br>Q9UNM6:13KNQ3:Q9UNM6-<br>2:A0A087WUL9:E9P138:H0YD73:E9PQG<br>3:E9PPD2:F8WB8<br>P10599:P10599-2<br>P43686:P43686-2<br>P17066:P48741<br>P02785:P02787<br>P40227:P40227-2:J3KR16<br>P62195:J3QJMT:J3QSE0:J3QRW1:J3KT<br>Q9 | 26S proteasome non-ATPase regulatory subunit 12                             | PSMD12      | 0.153654773 | 0.138221274 | 0.172209806 | 0.230342128 | 0.232389035 | 0.290505374 | 1.623054295 | 0.011927968 |
| 1:Z15:P11215-2<br>Q43242:H0VJG8:F5H8K4<br>Q9UNM6:13KNQ3:Q9UNM6-<br>2:A0A087WUL9:E9P138:H0YD73:E9PQG<br>3:E9PPD2:F8WB8<br>P10599:P10599-2<br>P43686:P43686-2<br>P17066:P48741<br>P02785:P02787<br>P40227:P40227-2:J3KR16<br>P62195:J3QJMT:J3QSE0:J3QRW1:J3KT<br>Q9 | Thioredoxin                                                                 | TXN         | 0.010303226 | 0.007898252 | 0.010909952 | 0.018689351 | 0.015719683 | 0.017505678 | 1.789493409 | 0.004089853 |
| 1:Z15:P11215-2<br>Q43242:H0VJG8:F5H8K4<br>Q9UNM6:13KNQ3:Q9UNM6-<br>2:A0A087WUL9:E9P138:H0YD73:E9PQG<br>3:E9PPD2:F8WB8<br>P10599:P10599-2<br>P43686:P43686-2<br>P17066:P48741<br>P02785:P02787<br>P40227:P40227-2:J3KR16<br>P62195:J3QJMT:J3QSE0:J3QRW1:J3KT<br>Q9 | 26S protease regulatory subunit 6B                                          | PSMC4       | 0.239815726 | 0.215152296 | 0.185328712 | 0.374695615 | 0.407262912 | 0.285617161 | 1.769471293 | 0.043301389 |
| 1:Z15:P11215-2<br>Q43242:H0VJG8:F5H8K4<br>Q9UNM6:13KNQ3:Q9UNM6-<br>2:A0A087WUL9:E9P138:H0YD73:E9PQG<br>3:E9PPD2:F8WB8<br>P10599:P10599-2<br>P43686:P43686-2<br>P17066:P48741<br>P02785:P02787<br>P40227:P40227-2:J3KR16<br>P62195:J3QJMT:J3QSE0:J3QRW1:J3KT<br>Q9 | Heat shock 70 kDa protein 6                                                 | HSPA6       | 0.02354706  | 0.031447754 | 0.047719256 | 0.055812556 | 0.067389213 | 0.070173697 | 1.748768923 | 0.016511504 |
| 1:Z15:P11215-2<br>Q43242:H0VJG8:F5H8K4<br>Q9UNM6:13KNQ3:Q9UNM6-<br>2:A0A087WUL9:E9P138:H0YD73:E9PQG<br>3:E9PPD2:F8WB8<br>P10599:P10599-2<br>P43686:P43686-2<br>P17066:P48741<br>P02785:P02787<br>P40227:P40227-2:J3KR16<br>P62195:J3QJMT:J3QSE0:J3QRW1:J3KT<br>Q9 | T-complex protein 1 subunit delta                                           | CTC4        | 0.005575232 | 0.004673363 | 0.003238244 | 0.00849115  | 0.007180554 | 0.007294403 | 1.734917661 | 0.014895445 |
| 1:Z15:P11215-2<br>Q43242:H0VJG8:F5H8K4<br>Q9UNM6:13KNQ3:Q9UNM6-<br>2:A0A087WUL9:E9P138:H0YD73:E9PQG<br>3:E9PPD2:F8WB8<br>P10599:P10599-2<br>P43686:P43686-2<br>P17066:P48741<br>P02785:P02787<br>P40227:P40227-2:J3KR16<br>P62195:J3QJMT:J3QSE0:J3QRW1:J3KT<br>Q9 | T-complex protein 1 subunit zeta                                            | CTC6A       | 0.010979883 | 0.00777022  | 0.005994958 | 0.015238795 | 0.013504136 | 0.01416762  | 1.724105636 | 0.017214999 |
| 1:Z15:P11215-2<br>Q43242:H0VJG8:F5H8K4<br>Q9UNM6:13KNQ3:Q9UNM6-<br>2:A0A087WUL9:E9P138:H0YD73:E9PQG<br>3:E9PPD2:F8WB8<br>P10599:P10599-2<br>P43686:P43686-2<br>P17066:P48741<br>P02785:P02787<br>P40227:P40227-2:J3KR16<br>P62195:J3QJMT:J3QSE0:J3QRW1:J3KT<br>Q9 | 26S protease regulatory subunit 8                                           | PSMC5       | 0.25575475  | 0.227850594 | 0.251653906 | 0.419041315 | 0.459439402 | 0.384446856 | 1.690446162 | 0.004264249 |
| 1:Z15:P11215-2<br>Q43242:H0VJG8:F5H8K4<br>Q9UNM6:13KNQ3:Q9UNM6-<br>2:A0A087WUL9:E9P138:H0YD73:E9PQG<br>3:E9PPD2:F8WB8<br>P10599:P10599-2<br>P43686:P43686-2<br>P17066:P48741<br>P02785:P02787<br>P40227:P40227-2:J3KR16<br>P62195:J3QJMT:J3QSE0:J3QRW1:J3KT<br>Q9 | 26S proteasome non-ATPase regulatory subunit 11                             | PSMD11      | 0.176558215 | 0.169195837 | 0.192050797 | 0.324160822 | 0.306906059 | 0.273815082 | 1.68317239  | 0.001658485 |
| 1:Z15:P11215-2<br>Q43242:H0VJG8:F5H8K4<br>Q9UNM6:13KNQ3:Q9UNM6-<br>2:A0A087WUL9:E9P138:H0YD73:E9PQG<br>3:E9PPD2:F8WB8<br>P10599:P10599-2<br>P43686:P43686-2<br>P17066:P48741<br>P02785:P02787<br>P40227:P40227-2:J3KR16<br>P62195:J3QJMT:J3QSE0:J3QRW1:J3KT<br>Q9 | 26S proteasome non-ATPase regulatory subunit 12                             | PSMD12      | 0.153654773 | 0.138221274 | 0.172209806 | 0.230342128 | 0.232389035 | 0.290505374 | 1.623054295 | 0.011927968 |
| 1:Z15:P11215-2<br>Q43242:H0VJG8:F5H8K4<br>Q9UNM6:13KNQ3:Q9UNM6-<br>2:A0A087WUL9:E9P138:H0YD73:E9PQG<br>3:E9PPD2:F8WB8<br>P10599:P10599-2<br>P43686:P43686-2<br>P17066:P48741<br>P02785:P02787<br>P40227:P40227-2:J3KR16<br>P62195:J3QJMT:J3QSE0:J3QRW1:J3KT<br>Q9 | Thioredoxin                                                                 | TXN         | 0.010303226 | 0.007898252 | 0.010909952 | 0.018689351 | 0.015719683 | 0.017505678 | 1.789493409 | 0.004089853 |
| 1:Z15:P11215-2<br>Q43242:H0VJG8:F5H8K4<br>Q9UNM6:13KNQ3:Q9UNM6-<br>2:A0A087WUL9:E9P138:H0YD73:E9PQG<br>3:E9PPD2:F8WB8<br>P10599:P10599-2<br>P43686:P43686-2<br>P17066:P48741<br>P02785:P02787<br>P40227:P40227-2:J3KR16<br>P62195:J3QJMT:J3QSE0:J3QRW1:J3KT<br>Q9 | 26S protease regulatory subunit 6B                                          | PSMC4       | 0.239815726 | 0.215152296 | 0.185328712 | 0.374695615 | 0.407262912 | 0.285617161 | 1.769471293 | 0.043301389 |
| 1:Z15:P11215-2<br>Q43242:H0VJG8:F5H8K4<br>Q9UNM6:13KNQ3:Q9UNM6-<br>                                                                                                                                                                                               |                                                                             |             |             |             |             |             |             |             |             |             |
